# Supplementary material
Source: publisher site journal article supplement (https://www.dovepress.com/article/488133)
Supplement: Supplementary file 1 [file get_supplementary_file.php]

**Supplementary Material**

| **Supplementary table 1. List of International Classification of Diseases (ICD) codes corresponding to musculoskeletal disorders and their subcategories** | | | | |
| --- | --- | --- | --- | --- |
| Categorization | ICD10 | ICD10 Used in Hospital/Claims Analyses | ICD9 | ICD9 Used in Hospital/Claims Analyses |
| MSDs (all) | G54.2-G54.4, I27.1, L93-L93.2, M00-M03.6, M05M10.19, M10.3-M25.9, M30-M32.9, M34-M36.8, M40M43.9, M45-M49, M49.2-M51.9, M53-M54.9, M61M63.89, M65-M68.8, M70-M72.4, M72.8-M73, M75M77.9, M79-M79.676, M79.8-M87.09, M87.2-M89.59, M89.7-M95.9, M99-M99.9, Z13.82-Z13.83, Z82.6Z82.69, Z87.3-Z87.39 | G54.2-G54.4, I27.1, L93-L93.2, M00M10.19, M10.3-M25.9, M30-M48.58, M49.81-M54.5, M61-M72.4, M72.8M87.09, M87.2-M95.9, M99-M99.9 | 274-274.9, 353.1-353.4, 416.1, 446446.9, 710-710.2, 710.5-724.9, 726727.9, 729-730.39, 730.7-739.9, V13.4V13.59, V17.7-V17.89, V43.6-V43.8, V58.64-V58.65, V58.78, V77.5, V82.1-V82.2 | 274-274.9, 353.1-353.4, 416.1, 446446.9, 710-727.9, 729-730.39, 730.7739.9 |
| Rheumatoid arthritis | M05-M05.9, M08-M09.8 | M05-M05.9 | 714-714.9 | 714-714.9 |
| Osteoarthritis | M16-M18.9 | M16-M19.93 | 715-715.98 | 715-715.98, 731-731.9 |
| Osteoarthritis hip | M16-M16.9 |  | 715.15, 715.25, 715.35 |  |
| Osteoarthritis knee | M17-M17.9 |  |  |  |
| Osteoarthritis hand | M18-M18.9 |  | 715.11-715.14, 715.16-715.17, 715.21715.24, 715.26-715.27, 715.30-715.34, 715.36-715.37 |  |
| Osteoarthritis other |  |  | 715-715.10, 715.18-715.20, 715.28715.3, 715.38-715.98 |  |
| Low back pain | G54.4, M47.015-M47.019, M47.15-M47.18, M47.25M47.28, M47.815-M47.818, M47.896-M47.899, M48.05-M48.08, M48.16-M48.19, M48.25-M48.27, M48.35-M48.38, M48.45-M48.48, M48.55-M48.58, M49.85-M49.88, M51.05-M51.07, M51.15-M51.17, M51.25-M51.27, M51.35-M51.37, M51.45-M51.47, M51.85-M51.87, M53.3, M53.85-M53.88, M54.05M54.09, M54.15-M54.18, M54.3-M54.5, M99.03M99.04, M99.13-M99.14, M99.23-M99.24, M99.33M99.34, M99.43-M99.44, M99.53-M99.54, M99.63M99.64, M99.73-M99.74, M99.83-M99.84 | G54.4, M47.015-M47.019, M47.15M47.18, M47.25-M47.28, M47.815M47.818, M47.896-M47.899, M48.05M48.08, M48.16-M48.19, M48.25M48.27, M48.35-M48.38, M48.45M48.48, M48.55-M48.58, M49.85M49.88, M51.05-M51.87, M53.3, M53.85-M53.88, M54.05-M54.09, M54.15-M54.18, M54.3-M54.5, M99.03-M99.04, M99.13-M99.14, M99.23-M99.24, M99.33-M99.34, M99.43-M99.44, M99.53-M99.54, M99.63-M99.64, M99.73-M99.74, M99.83-M99.84 | 353.1, 353.4, 721.3, 721.42, 722.10, 722.32, 722.52, 722.73, 722.83, 722.93, 724.02-724.03, 724.2-724.3, 724.6724.79 | 353.1, 353.4, 721.3-721.42, 722.10722.52, 722.73, 722.83, 722.93724.79 |
| Neck pain | G54.2, M47.011-M47.013, M47.11-M47.13, M47.21M47.23, M47.811-M47.813, M47.892-M47.894, M48.01-M48.03, M48.12-M48.14, M48.21-M48.23, M48.31-M48.33, M48.41-M48.43, M48.51-M48.53, M49.81-M49.83, M50-M50.93, M53.0-M53.1, M53.81M53.83, M54.01-M54.03, M54.11-M54.13, M54.2, M54.81, M99.01, M99.11, M99.21, M99.31, M99.41, M99.51, M99.61, M99.71, M99.81 | G54.2, M47.011-M47.013, M47.11M47.13, M47.21-M47.23, M47.811M47.813, M47.892-M47.894, M48.01M48.03, M48.12-M48.14, M48.21M48.23, M48.31-M48.33, M48.41M48.43, M48.51-M48.53, M49.81M49.83, M50-M50.93, M53.0-M53.1, M53.81-M53.83, M54.01-M54.03, M54.11-M54.13, M54.2, M99.01, M99.11, M99.21, M99.31, M99.41, M99.51, M99.61, M99.71, M99.81 | 353.2, 721.0-721.1, 722.0, 722.71, 722.81, 722.91, 723-723.9 | 353.2, 721.0-721.1, 722.0, 722.71, 722.81, 722.91 |
| Gout | M10-M10.19, M10.3-M10.9, M1A00X0-M1A9XX1 | M10-M10.19, M10.3-M10.9, M1A.00X.0-M1A.9XX.1 | 274-274.9, 712.0-712.09 | 274-274.9, 712.0-712.09 |
| Other MSDs | G54.3, I27.1, L93-L93.2, M00-M03.6, M06-M07.69, M11-M15.9, M19-M19.93, M20-M25.9, M30-M32.9, M34-M36.8, M40-M43.9, M45-M47.01, M47.014, M47.02-M47.10, M47.14, M47.2-M47.20, M47.24, M47.8-M47.81, M47.814, M47.819-M47.891, M47.895, M47.9-M48.00, M48.04, M48.1-M48.11, M48.15, M48.2-M48.20, M48.24, M48.3-M48.30, M48.34, M48.4-M48.40, M48.44, M48.5-M48.50, M48.54, M48.8-M49, M49.2-M49.80, M49.84, M49.89, M51M51.04, M51.1-M51.14, M51.2-M51.24, M51.3M51.34, M51.4-M51.44, M51.8-M51.84, M51.9, M53, M53.2, M53.8-M53.80, M53.84, M53.9-M54.00, M54.04, M54.1-M54.10, M54.14, M54.6-M54.8, M54.89-M54.9, M61-M63.89, M65-M68.8, M70-M72.4, M72.8-M73, M75-M77.9, M79-M79.676, M79.8M87.09, M87.2-M89.59, M89.7-M95.9, M99-M99.00, M99.02, M99.05-M99.10, M99.12, M99.15-M99.20, M99.22, M99.25-M99.30, M99.32, M99.35-M99.40, M99.42, M99.45-M99.50, M99.52, M99.55-M99.60, M99.62, M99.65-M99.70, M99.72, M99.75-M99.80, M99.82, M99.85-M99.9 | I27.1, L93-L93.2, M00-M03.6, M06M09.8, M11-M15.9, M20-M25.9, M30M46.99, M61-M72.4, M72.8-M87.09, M87.2-M95.9, M99, M99.05-M99.09, M99.15-M99.19, M99.25-M99.29, M99.35-M99.39, M99.45-M99.49, M99.55-M99.59, M99.65-M99.69, M99.75-M99.79, M99.85-M99.9 | 353.3, 416.1, 446-446.9, 710-710.2, 710.5-712, 712.1-713.8, 716-721, 721.2, 721.4-721.41, 721.5-722, 722.1, 722.11-722.31, 722.39-722.51, 722.6722.70, 722.72, 722.8-722.80, 722.82, 722.9-722.90, 722.92, 724-724.01, 724.09-724.1, 724.4-724.5, 724.8724.9, 726-727.9, 729-730.39, 730.7739.9 | 416.1, 446-446.9, 710-712, 712.1713.8, 716-720.9, 726-727.9, 729730.39, 730.7-730.99, 732-739.9 |
| MSDs: musculoskeletal disorders. | | | | |

| **Supplementary table 2. A summary of the number of cases, incidence, death, DALYs, ASRs and EAPC of musculoskeletal disorders at global, country, regional, age and sex levels.** | | | | | | | | | | | | | | |
| --- | --- | --- | --- | --- | --- | --- | --- | --- | --- | --- | --- | --- | --- | --- |
| Objectives |  | Prevalence | | | | | |  | Incidence | | | | | |
|  | Num_1990 | ASR_1990 | Num_2021 | Num Change (%) | ASR_2021 | EAPC_CI |  | Num_1990 | ASR_1990 | Num_2021 | Num Change (%) | ASR_2021 | EAPC_CI |
| Global |  | 865073986 (813102876-917749058) | 19178.47 (18084.37-20279.51) | 1686561517 (1599166937-1780146354) | 95.00 | 19832.2 (18810.81-20938.74) | 0.15 (0.13-0.17) |  | 215339150 (194696724-237685150) | 4641.5 (4195.96-5099.98) | 367193431 (333085118-402083085) | 70.50 | 4351.79 (3962.31-4762.68) | -0.16 (-0.19--0.13) |
|  | | | | | | | | | | | | | | |
| Female |  | 513376091 (483853082-543956813) | 22156.51 (20938.84-23392.82) | 994322858 (945595381-1046495141) | 93.68 | 22848.02 (21693.19-24065.72) | 0.14 (0.12-0.17) |  | 129457913 (116480420-143261315) | 5474.08 (4941.09-6031.9) | 222055765 (200694119-243211093) | 71.53 | 5169.31 (4689.39-5671.32) | -0.13 (-0.17--0.1) |
| Male |  | 351697895 (329273362-374600852) | 16064.65 (15109.85-17042.87) | 692238660 (654301488-732831470) | 96.83 | 16718.8 (15809.47-17697.82) | 0.17 (0.15-0.18) |  | 85881237 (77541039-94716129) | 3775.34 (3419.91-4137.98) | 145137666 (132100064-158953588) | 69.00 | 3512.3 (3198.95-3836.39) | -0.2 (-0.23--0.17) |
|  | | | | | | | | | | | | | | |
| <5 years |  | 0 (0-0) | 0 (0-0) | 0 (0-0) | 0 | 0 (0-0) | 0 (0-0) |  | 0 (0-0) | 0 (0-0) | 0 (0-0) | 0 | 0 (0-0) | 0 (0-0) |
| 5-9 years |  | 3156438 (2022327-4630606) | 540.92 (346.57-793.55) | 3634031 (2351670-5305950) | 15.13075815 | 528.93 (342.28-772.28) | -0.04 (-0.06--0.01) |  | 2793031 (1771364-4194421) | 478.64 (303.56-718.8) | 3212806 (2046510-4798032) | 15.02937132 | 467.62 (297.87-698.35) | -0.04 (-0.06--0.01) |
| 10-14 years |  | 15357773 (12077152-19668366) | 2866.95 (2254.53-3671.65) | 19354393 (15331010-24436490) | 26.02343452 | 2903.29 (2299.76-3665.64) | 0.07 (0.05-0.08) |  | 8026354 (5825447-10650310) | 1498.34 (1087.48-1988.18) | 9579570 (7014492-12660674) | 19.35145148 | 1437 (1052.22-1899.19) | -0.14 (-0.16--0.12) |
| 15-19 years |  | 32036675 (24644633-40126034) | 6167.74 (4744.61-7725.11) | 39478692 (31042409-48762038) | 23.22967973 | 6326.92 (4974.91-7814.68) | 0.06 (0.04-0.09) |  | 11447425 (8281059-15265676) | 2203.87 (1594.28-2938.97) | 13037305 (9473096-17379774) | 13.88853825 | 2089.38 (1518.17-2785.31) | -0.21 (-0.25--0.16) |
| 20-24 years |  | 44998072 (35828318-55587502) | 9144.32 (7280.88-11296.25) | 56469469 (45922867-68460531) | 25.49308557 | 9456.37 (7690.24-11464.39) | 0.11 (0.08-0.14) |  | 13053375 (9077496-17481276) | 2652.65 (1844.69-3552.47) | 14841811 (10386214-19803294) | 13.70094707 | 2485.41 (1739.27-3316.26) | -0.21 (-0.26--0.16) |
| 25-29 years |  | 57073415 (46100223-68889073) | 12894.46 (10415.31-15563.94) | 78324612 (63595987-93970055) | 37.23484393 | 13312.74 (10809.33-15971.98) | 0.16 (0.13-0.19) |  | 14597773 (10163222-19450650) | 3298.04 (2296.15-4394.44) | 17575627 (12239186-23201548) | 20.39937188 | 2987.31 (2080.28-3943.54) | -0.22 (-0.28--0.17) |
| 30-34 years |  | 63884503 (52079051-76021308) | 16575.19 (13512.2-19724.15) | 101532608 (83872184-118649226) | 58.93151427 | 16796.68 (13875.09-19628.31) | 0.13 (0.08-0.18) |  | 16498596 (11684985-22387379) | 4280.65 (3031.73-5808.53) | 22831639 (16254968-30897469) | 38.38534503 | 3777.07 (2689.08-5111.41) | -0.28 (-0.36--0.2) |
| 35-39 years |  | 72844684 (61809106-86473959) | 20680.15 (17547.22-24549.42) | 118637230 (101194466-140216678) | 62.86326398 | 21152.5 (18042.54-25000.03) | 0.13 (0.09-0.17) |  | 19703997 (15238749-25945969) | 5593.84 (4326.19-7365.9) | 28728881 (22254108-37630886) | 45.80230092 | 5122.24 (3967.81-6709.42) | -0.22 (-0.29--0.15) |
| 40-44 years |  | 74853172 (63807574-87250155) | 26128.44 (22272.83-30455.76) | 134497546 (116122182-155682372) | 79.68182564 | 26886.02 (23212.79-31120.86) | 0.14 (0.11-0.17) |  | 19442827 (14906166-25223490) | 6786.76 (5203.18-8804.57) | 31928240 (24772895-41206248) | 64.2160371 | 6382.45 (4952.1-8237.12) | -0.16 (-0.2--0.11) |
| 45-49 years |  | 74203936 (65165002-85076269) | 31957.53 (28064.71-36639.93) | 156990140 (138757838-177971306) | 111.5657854 | 33154.93 (29304.43-37585.97) | 0.17 (0.14-0.19) |  | 18158296 (14206030-23104213) | 7820.26 (6118.13-9950.33) | 35382308 (27934893-44434791) | 94.85478153 | 7472.43 (5899.6-9384.24) | -0.11 (-0.14--0.08) |
| 50-54 years |  | 81203210 (72810882-90680607) | 38200.43 (34252.42-42658.88) | 177675354 (159916489-196584346) | 118.8033626 | 39933.96 (35942.51-44183.9) | 0.19 (0.17-0.21) |  | 18826423 (14394865-23917865) | 8856.51 (6771.78-11251.68) | 37340152 (29002083-47084774) | 98.33906845 | 8392.5 (6518.45-10582.68) | -0.12 (-0.15--0.09) |
| 55-59 years |  | 81285434 (73372741-90585933) | 43890.63 (39618.12-48912.5) | 182480404 (165987655-199784274) | 124.4933625 | 46112.58 (41944.88-50485.25) | 0.21 (0.2-0.23) |  | 17779451 (13814517-22324217) | 9600.14 (7459.24-12054.12) | 36172349 (28523161-45092593) | 103.4503146 | 9140.71 (7207.77-11394.85) | -0.11 (-0.13--0.08) |
| 60-64 years |  | 78709183 (70930024-86958838) | 49006.64 (44163.1-54143.11) | 164840848 (150408113-180582121) | 109.4302618 | 51505.06 (46995.51-56423.48) | 0.21 (0.19-0.23) |  | 16650354 (12558212-20683020) | 10367 (7819.11-12877.85) | 31604095 (24216023-39025051) | 89.81034878 | 9874.8 (7566.38-12193.51) | -0.13 (-0.15--0.1) |
| 65-69 years |  | 66015767 (60498827-71962649) | 53406.73 (48943.53-58217.75) | 153025930 (141510925-165892040) | 131.8020936 | 55475.9 (51301.41-60140.21) | 0.17 (0.15-0.19) |  | 13705658 (10461643-17623284) | 11087.87 (8463.46-14257.23) | 28670995 (22116773-36578071) | 109.1909414 | 10393.99 (8017.91-13260.51) | -0.18 (-0.21--0.15) |
| 70-74 years |  | 48432580 (44050469-53261017) | 57207.56 (52031.5-62910.81) | 121895559 (111988930-132852452) | 151.6809119 | 59218.82 (54406.02-64541.86) | 0.12 (0.11-0.14) |  | 10295262 (7760997-13442643) | 12160.55 (9167.13-15878.17) | 23493578 (17948363-30345736) | 128.1979614 | 11413.56 (8719.6-14742.45) | -0.2 (-0.22--0.18) |
| 75-79 years |  | 37096156 (33811884-40430528) | 60264.55 (54929.09-65681.41) | 80596628 (74188522-87045452) | 117.264096 | 61111.57 (56252.69-66001.32) | 0.08 (0.06-0.09) |  | 7822848 (6057366-9806954) | 12708.61 (9840.49-15931.89) | 15393092 (12037643-19309036) | 96.77094582 | 11671.65 (9127.42-14640.88) | -0.18 (-0.21--0.15) |
| 80-84 years |  | 21579145 (19750058-23375134) | 60999.52 (55829.09-66076.39) | 54334963 (50057170-58407849) | 151.7938639 | 62038.21 (57153.94-66688.53) | 0.06 (0.05-0.07) |  | 4337190 (3215520-5686615) | 12260.29 (9089.57-16074.82) | 10207431 (7691897-13299982) | 135.3466415 | 11654.57 (8782.4-15185.57) | -0.12 (-0.14--0.09) |
| 85-89 years |  | 9197848 (8431841-9975733) | 60868.27 (55799.09-66016.05) | 28406866 (26200654-30543015) | 208.8425249 | 62129.82 (57304.52-66801.88) | 0.09 (0.07-0.1) |  | 1685213 (1300953-2129619) | 11152.17 (8609.27-14093.1) | 4936766 (3829281-6190668) | 192.9461142 | 10797.4 (8375.18-13539.86) | -0.06 (-0.07--0.04) |
| 90-94 years |  | 2549649 (2359214-2738057) | 59499.13 (55055.1-63895.85) | 11033914 (10264932-11778150) | 332.7620782 | 61678.6 (57380.05-65838.81) | 0.13 (0.12-0.15) |  | 423232 (316731-535378) | 9876.62 (7391.29-12493.68) | 1757086 (1333028-2207674) | 315.1590617 | 9821.96 (7451.51-12340.7) | 0.01 (-0.01-0.03) |
| 95+ years |  | 596346 (546011-636710) | 58575.17 (53631.08-62539.88) | 3352332 (3099227-3572942) | 462.1454659 | 61507.19 (56863.33-65554.85) | 0.17 (0.15-0.19) |  | 91844 (64056-123485) | 9021.29 (6291.8-12129.11) | 499701 (351895-665234) | 444.0758242 | 9168.3 (6456.43-12205.44) | 0.06 (0.03-0.09) |
|  | | | | | | | | | | | | | | |
| High-middle SDI |  | 196217614 (184552733-208346576) | 18705.68 (17643.35-19822.41) | 337089857 (319246109-355491802) | 71.80 | 19185.83 (18131.84-20280.21) | 0.14 (0.11-0.17) |  | 51737421 (46635281-57150448) | 4890.66 (4412.71-5376.81) | 75796636 (68172789-82973847) | 46.50 | 4491.2 (4078.39-4908.12) | -0.21 (-0.25--0.17) |
| High SDI |  | 227753506 (216117181-240227722) | 22490.8 (21278.81-23767.59) | 363813440 (348385398-379178529) | 59.70 | 23724.71 (22704.11-24819.73) | 0.19 (0.19-0.2) |  | 55643091 (50462753-61172594) | 5611.45 (5084.03-6163.41) | 78388137 (71420031-85006514) | 40.90 | 5385.86 (4935.86-5879.53) | -0.09 (-0.11--0.06) |
| Low-middle SDI |  | 148939150 (139392462-159228128) | 18518.9 (17451.96-19658.02) | 331961620 (312545815-353057761) | 122.90 | 19576.12 (18498.43-20737.96) | 0.19 (0.16-0.22) |  | 36099461 (32508299-40160492) | 4253.41 (3836.32-4693) | 72038503 (64937397-79438747) | 99.60 | 4152.08 (3753.64-4570.84) | -0.09 (-0.14--0.04) |
| Low SDI |  | 52981478 (49315633-56630192) | 17291.48 (16235.22-18341.39) | 127796380 (119266781-136310466) | 141.20 | 17779.07 (16755.04-18834.41) | 0.1 (0.08-0.12) |  | 14115540 (12717871-15673425) | 4294.93 (3869.94-4729.49) | 32261289 (29086642-35791169) | 128.60 | 4165.89 (3768.74-4584.96) | -0.11 (-0.14--0.09) |
| Middle SDI |  | 238305244 (223189020-253777512) | 18050.37 (17039.03-19110.7) | 524541984 (495535975-554819459) | 120.10 | 19086.18 (18055.67-20195.4) | 0.24 (0.22-0.26) |  | 57503060 (51859854-63640714) | 4147.5 (3750.24-4562.94) | 108378077 (98402395-118969674) | 88.50 | 3984.97 (3625.76-4357.28) | -0.06 (-0.1--0.02) |
|  | | | | | | | | | | | | | | |
| Advanced Health System |  | 329609872 (312367329-347922257) | 21848.54 (20678.82-23085.94) | 491395318 (469353550-513718037) | 49.08392004 | 23045.05 (21946.06-24180.88) | 0.2 (0.19-0.21) |  | 84427549 (76560456-92637291) | 5709.97 (5170.94-6272.42) | 111868291 (101421088-121850875) | 32.50211847 | 5530.69 (5040.87-6065.09) | -0.06 (-0.08--0.04) |
| Africa |  | 66743095 (62228456-71256232) | 17272.94 (16239.07-18308.11) | 166036893 (155091314-177046447) | 148.7701432 | 18062.99 (16992-19087.55) | 0.15 (0.14-0.15) |  | 18498514 (16704086-20489986) | 4414.2 (3990.92-4857.89) | 43379126 (39255949-48082614) | 134.5005983 | 4377.53 (3963.14-4807.12) | -0.03 (-0.05--0.02) |
| African Region |  | 51211172 (47756972-54675370) | 16939.33 (15919.23-17946.39) | 128664306 (120033401-137209709) | 151.2426507 | 17609.75 (16603.46-18603.91) | 0.13 (0.13-0.13) |  | 14118441 (12737508-15606942) | 4308.34 (3891.36-4745.84) | 33819531 (30581988-37479154) | 139.54154 | 4265.45 (3862.81-4681.3) | -0.04 (-0.05--0.02) |
| America |  | 150715197 (142344726-159372165) | 23014.23 (21780.88-24228.56) | 290670270 (278376361-303449252) | 92.8606244 | 24122.85 (23092.23-25208.98) | 0.13 (0.12-0.15) |  | 34791119 (31487090-38329669) | 5216.68 (4724.5-5735.06) | 59816576 (54888356-64936190) | 71.93058953 | 5081.96 (4668.33-5534.26) | -0.05 (-0.08--0.02) |
| Andean Latin America |  | 4792225 (4478092-5113180) | 18076.23 (17030.39-19168.49) | 12380808 (11706833-13136094) | 158.3519764 | 19354.32 (18340.33-20478.1) | 0.23 (0.22-0.24) |  | 1039324 (943909-1143396) | 3613.45 (3276.25-3955.37) | 2404869 (2187247-2630331) | 131.3878059 | 3709.29 (3381.3-4053.17) | 0.1 (0.08-0.12) |
| Asia |  | 455538748 (426429296-485267920) | 18165.08 (17089.2-19239.15) | 975630015 (922460302-1033352246) | 114.170588 | 19036.66 (18013.82-20156.91) | 0.22 (0.19-0.26) |  | 110129088 (99405908-121870284) | 4226.34 (3810.64-4644.59) | 200837175 (182344612-220226486) | 82.36523942 | 3952.12 (3591.98-4323.04) | -0.15 (-0.2--0.1) |
| Australasia |  | 5229062 (4951182-5536859) | 23392.73 (22115.73-24803.82) | 9877345 (9413611-10392283) | 88.89324701 | 24006.02 (22725.97-25442.16) | 0.11 (0.09-0.13) |  | 1340480 (1217225-1487535) | 6073.27 (5530.34-6750.67) | 2257396 (2032665-2479696) | 68.40206493 | 5822.56 (5265.22-6385.09) | -0.08 (-0.1--0.06) |
| Basic Health System |  | 325844547 (305111760-347509460) | 17759.5 (16723.15-18821.61) | 693938569 (654958486-732380574) | 112.9661446 | 18712.56 (17671.83-19801.85) | 0.23 (0.21-0.26) |  | 80204029 (72339101-88686618) | 4180.78 (3774.36-4591.68) | 146610668 (133046110-160418848) | 82.79713604 | 4039.46 (3674.45-4413.61) | -0.02 (-0.06-0.03) |
| Caribbean |  | 5035798 (4727916-5330862) | 17093.25 (16121.09-18084.94) | 9453225 (8933127-9978991) | 87.72049633 | 18121.89 (17141-19136.8) | 0.19 (0.19-0.2) |  | 1146192 (1039097-1260045) | 3724.12 (3371.49-4080.55) | 1923462 (1748904-2098393) | 67.81324595 | 3747.54 (3408.96-4089.28) | 0.04 (0.03-0.05) |
| Central Africa |  | 6701898 (6250297-7174056) | 17166.08 (16115.64-18230.14) | 17376864 (16109800-18641539) | 159.2827286 | 17199.99 (16178.16-18233.3) | -0.02 (-0.03-0) |  | 1858653 (1676917-2063151) | 4394.77 (3961.58-4846.19) | 4749839 (4305039-5285801) | 155.5527578 | 4290.32 (3883.06-4712.58) | -0.1 (-0.11--0.08) |
| Central Asia |  | 9327679 (8749641-9971197) | 17319.25 (16237.28-18401.04) | 16754056 (15622498-17875971) | 79.61655842 | 18340.41 (17190.89-19492.94) | 0.21 (0.19-0.22) |  | 2780089 (2507471-3080186) | 4962.64 (4496.75-5481.44) | 4655357 (4195903-5175279) | 67.45352397 | 4997.49 (4517.75-5531.33) | 0.03 (0.02-0.04) |
| Central Europe |  | 29046728 (27168771-30992026) | 20576.21 (19204.02-21929.13) | 35590687 (33436455-37673411) | 22.52907453 | 21233.38 (19883.06-22585.62) | 0.11 (0.1-0.11) |  | 8841164 (7944820-9787670) | 6351.75 (5721.61-7031.97) | 9935480 (8880203-10892027) | 12.37751047 | 6315.61 (5685.03-6985.16) | -0.03 (-0.03--0.02) |
| Central Latin America |  | 23843543 (22212226-25548665) | 20764.73 (19541.29-22038.06) | 58122386 (54835203-61545225) | 143.7657273 | 22164.94 (20928.51-23435.23) | 0.18 (0.17-0.2) |  | 5391592 (4882407-5963824) | 4296.51 (3892.97-4737.44) | 11576036 (10486211-12751184) | 114.7053412 | 4401.28 (3983.78-4838.38) | 0.08 (0.05-0.11) |
| Central Sub-Saharan Africa |  | 5498696 (5111963-5891724) | 17218.13 (16186.9-18319.4) | 14456575 (13400883-15487799) | 162.9091516 | 17369.89 (16325.99-18445.56) | 0 (-0.02-0.02) |  | 1535151 (1381373-1703224) | 4415.05 (3974.8-4871.6) | 3958034 (3584894-4406091) | 157.8270151 | 4337.32 (3927.43-4774.38) | -0.08 (-0.09--0.06) |
| Commonwealth High Income |  | 29177778 (27693904-30824579) | 22290.04 (21079.22-23592.43) | 46333878 (44153165-48628807) | 58.7985144 | 23087.46 (21895.9-24377.67) | 0.12 (0.11-0.14) |  | 6821460 (6192082-7541745) | 5376 (4870.45-5963.7) | 10060244 (9047988-10993369) | 47.47933727 | 5290.3 (4791.91-5826.35) | 0.02 (0-0.05) |
| Commonwealth Low Income |  | 23740789 (22301744-25390047) | 19069.6 (18025.75-20179.34) | 58783230 (55125001-62506211) | 147.6043656 | 19954.99 (18821.91-21076.75) | 0.18 (0.16-0.19) |  | 6009905 (5427240-6684757) | 4519.03 (4076.4-5007.23) | 13552395 (12177269-15015341) | 125.5009855 | 4412.06 (3977.48-4876.6) | -0.06 (-0.08--0.03) |
| Commonwealth Middle Income |  | 153078829 (143490044-163816139) | 18450.35 (17401.3-19615.63) | 361621933 (339743614-386094836) | 136.2324923 | 19493.78 (18383.36-20709.2) | 0.2 (0.15-0.26) |  | 35568815 (31982691-39447678) | 4098.68 (3693.05-4511.79) | 73613697 (66397159-81184101) | 106.9613424 | 3891.7 (3521.79-4272.9) | -0.19 (-0.29--0.1) |
| East Asia |  | 177345855 (165865169-189261217) | 17004.76 (15989.6-18010.87) | 355506516 (335376300-374938416) | 100.4594446 | 17476.06 (16496.17-18485.16) | 0.21 (0.17-0.26) |  | 43610541 (39288198-48232517) | 4045.24 (3656.65-4441.49) | 71531138 (64649254-78022782) | 64.02258803 | 3654.26 (3333.79-3975.33) | -0.17 (-0.24--0.1) |
| East Asia & Pacific - WB |  | 282043773 (264214734-300408978) | 17710.46 (16645.95-18731.87) | 559501713 (529113292-590420453) | 98.37407047 | 18158.94 (17151.02-19189.34) | 0.17 (0.14-0.21) |  | 68682467 (61848961-75775964) | 4175.44 (3774.07-4589.11) | 114270153 (103244847-124811269) | 66.37456107 | 3824.73 (3492.36-4166.19) | -0.17 (-0.22--0.12) |
| Eastern Africa |  | 16388659 (15231283-17593889) | 16621.14 (15588.98-17669.33) | 41471278 (38609098-44574854) | 153.0486356 | 17361.82 (16338.27-18386.64) | 0.15 (0.13-0.17) |  | 4747761 (4284455-5269965) | 4405.52 (3974.44-4856.79) | 11350904 (10225478-12610481) | 139.0790943 | 4351.11 (3927.09-4792.03) | -0.05 (-0.05--0.04) |
| Eastern Europe |  | 52691207 (49377856-55972579) | 20004.87 (18696.82-21298.48) | 59822741 (56392177-63473324) | 13.53458083 | 20333.88 (19093.82-21584.55) | 0.13 (0.1-0.15) |  | 15430639 (13823984-17029152) | 5984.4 (5391.36-6595.1) | 16442966 (14665021-18034734) | 6.560499536 | 5896.94 (5312.61-6490.33) | 0 (-0.01-0.02) |
| Eastern Mediterranean Region |  | 44678577 (41559981-47998241) | 18116.39 (16991.74-19258.21) | 121816302 (113695695-130495762) | 172.6503622 | 19701.28 (18501.98-20938.77) | 0.29 (0.27-0.3) |  | 12462262 (11219882-13880719) | 4666.37 (4193.95-5143.4) | 30728075 (27721005-34179377) | 146.5690017 | 4752.19 (4281.04-5229.96) | 0.08 (0.07-0.08) |
| Eastern Sub-Saharan Africa |  | 17270439 (16043323-18514994) | 16366.75 (15356.51-17374.01) | 43041353 (40096443-46289911) | 149.2197969 | 16961.98 (15964.31-17973.83) | 0.12 (0.11-0.14) |  | 4983996 (4499272-5540044) | 4328.58 (3907.59-4770.3) | 11861461 (10704317-13164998) | 137.9909815 | 4273.12 (3855.32-4705.88) | -0.05 (-0.06--0.05) |
| Europe |  | 190480555 (179934252-201785900) | 20245.63 (19066.2-21476.81) | 251780777 (237749043-265316128) | 32.18187914 | 20793.59 (19666.42-22051.27) | 0.11 (0.1-0.13) |  | 51529360 (46529794-56615923) | 5624.09 (5091.22-6182.93) | 62632611 (56043368-68780400) | 21.54742655 | 5504.39 (4963.5-6073.15) | -0.04 (-0.06--0.03) |
| Europe & Central Asia - WB |  | 196547802 (185645105-208245858) | 20108.58 (18937.58-21330.09) | 263614737 (248930559-277953318) | 34.12245485 | 20593.75 (19469.06-21839.5) | 0.1 (0.09-0.12) |  | 53353249 (48165606-58630695) | 5588.08 (5058.46-6143.55) | 65951798 (59081030-72357346) | 23.61346167 | 5458.06 (4925.01-6022.65) | -0.05 (-0.06--0.04) |
| European Region |  | 197992327 (187017782-209771173) | 20111.11 (18939.9-21331.48) | 266556503 (251699955-281062370) | 34.62971371 | 20599.34 (19474.19-21844.95) | 0.1 (0.09-0.12) |  | 53747366 (48516654-59065545) | 5587.75 (5057.41-6143.71) | 66686245 (59751610-73152740) | 24.07351274 | 5457.62 (4924.22-6022.16) | -0.05 (-0.06--0.04) |
| High-income Asia Pacific |  | 47375854 (44694465-50206643) | 23844.68 (22457.51-25274.64) | 72214676 (68709101-75657696) | 52.42928602 | 24494.51 (23159.1-25932.29) | 0.18 (0.13-0.22) |  | 11548915 (10456930-12723044) | 5885.08 (5307.21-6497.95) | 14811053 (13368275-16155708) | 28.24627249 | 5528.41 (5007.6-6088.19) | -0.14 (-0.16--0.11) |
| High-income North America |  | 79590040 (75447720-83595899) | 25135.98 (23831.23-26425.8) | 134363482 (129922324-139001901) | 68.81946786 | 27620.77 (26639.49-28538.28) | 0.31 (0.29-0.32) |  | 18561650 (16810711-20480798) | 5963.2 (5425.17-6551.91) | 27161678 (25059252-29222670) | 46.33223878 | 5781.14 (5365.85-6237.42) | -0.01 (-0.07-0.04) |
| Latin America & Caribbean - WB |  | 71814974 (67229642-76465428) | 21278.28 (20055.16-22547.8) | 157333964 (148609401-166537017) | 119.0823936 | 22093.91 (20857.58-23390.72) | 0.08 (0.06-0.11) |  | 16373278 (14757452-18140026) | 4570 (4133.85-5044.1) | 32840388 (29789569-36129378) | 100.5730801 | 4645.24 (4212.02-5100.91) | 0.04 (0.03-0.06) |
| Limited Health System |  | 195548578 (183111128-209167768) | 18395.16 (17352.8-19522.5) | 467504774 (439447415-498596865) | 139.0734716 | 19416.86 (18324.45-20582.87) | 0.2 (0.16-0.24) |  | 46754042 (42089275-51874930) | 4175.44 (3761.95-4602.45) | 99326302 (89631382-109491874) | 112.4443102 | 4009.18 (3624.98-4408.43) | -0.15 (-0.22--0.08) |
| Middle East & North Africa - WB |  | 32653959 (30271481-35147543) | 18936.71 (17799.58-20144.2) | 89164202 (83334784-95259951) | 173.0578611 | 20305.45 (19109.33-21545.07) | 0.22 (0.21-0.23) |  | 9441688 (8521978-10475460) | 5026.12 (4526.8-5535.85) | 22567525 (20473397-24997068) | 139.0200248 | 5007.26 (4512.17-5495.1) | -0.01 (-0.02-0) |
| Minimal Health System |  | 13193993 (12290821-14109460) | 16426.82 (15421.5-17473.2) | 32364619 (29959849-34724955) | 145.2981368 | 16792.15 (15765.67-17835.7) | 0.06 (0.05-0.07) |  | 3712953 (3339125-4117929) | 4279.2 (3860.8-4708.66) | 9057380 (8196264-10053849) | 143.940066 | 4256.28 (3856.52-4674.91) | -0.03 (-0.05--0.01) |
| North Africa and Middle East |  | 43856966 (40754138-47118301) | 18879.39 (17743.75-20053.79) | 115845070 (108384351-123549391) | 164.1429186 | 20323.48 (19147.83-21548.68) | 0.25 (0.24-0.25) |  | 12586643 (11386026-13868066) | 4997.96 (4514.34-5482.79) | 29272457 (26542135-32401040) | 132.5676274 | 4999.06 (4504.8-5483.06) | 0.01 (0-0.02) |
| North America |  | 79588758 (75446628-83594493) | 25134.9 (23830.19-26424.72) | 134365043 (129923971-139003916) | 68.82414851 | 27619.83 (26638.58-28537.4) | 0.31 (0.29-0.32) |  | 18561145 (16810342-20480187) | 5962.93 (5424.93-6551.6) | 27161682 (25059227-29222605) | 46.33624165 | 5780.94 (5365.66-6237.19) | -0.01 (-0.07-0.04) |
| Northern Africa |  | 15851171 (14763029-17022715) | 18794.36 (17650.69-19987.14) | 38591758 (36163149-41151593) | 143.4631359 | 20471.77 (19278.92-21707.61) | 0.27 (0.25-0.29) |  | 4437675 (4012022-4920452) | 4868.28 (4395.61-5377.07) | 9588367 (8685769-10622028) | 116.0673551 | 4958.68 (4477.51-5457.73) | 0.06 (0.03-0.08) |
| Oceania |  | 684249 (639078-733141) | 16401.53 (15460.93-17393.31) | 1729825 (1615429-1849544) | 152.8063614 | 16938.01 (15955.9-17988.85) | 0.1 (0.09-0.11) |  | 171754 (154200-190233) | 3819.89 (3458.22-4198.27) | 415703 (374296-460315) | 142.0339555 | 3840.6 (3477.45-4223.5) | 0.02 (0.01-0.04) |
| Region of the Americas |  | 150715197 (142344726-159372165) | 23014.23 (21780.88-24228.56) | 290670270 (278376361-303449252) | 92.8606244 | 24122.85 (23092.23-25208.98) | 0.13 (0.12-0.15) |  | 34791119 (31487090-38329669) | 5216.68 (4724.5-5735.06) | 59816576 (54888356-64936190) | 71.93058953 | 5081.96 (4668.33-5534.26) | -0.05 (-0.08--0.02) |
| South-East Asia Region |  | 174042368 (163346036-185907282) | 18465.36 (17378.02-19600.32) | 399286484 (375270746-425500902) | 129.4191286 | 19604.93 (18502.96-20833.45) | 0.22 (0.18-0.27) |  | 39721603 (35793745-43956074) | 4045.93 (3645.59-4455.54) | 78388342 (70771111-86442744) | 97.34435692 | 3828.34 (3466.36-4205.68) | -0.19 (-0.28--0.11) |
| South Asia |  | 146674305 (137572785-156930500) | 18997.97 (17888.01-20190.8) | 345207873 (324372754-368677018) | 135.356747 | 20135.25 (19004.14-21414.55) | 0.22 (0.16-0.27) |  | 33602151 (30187526-37310934) | 4171.7 (3758.87-4611.17) | 68149243 (61465052-75400454) | 102.8121444 | 3931.2 (3549.12-4321.92) | -0.21 (-0.31--0.11) |
| South Asia - WB |  | 150101153 (140780648-160643620) | 18917.4 (17811.8-20118.33) | 352850622 (331508804-376702426) | 135.0752242 | 20070.76 (18938.5-21345.85) | 0.22 (0.17-0.28) |  | 34464093 (30971897-38253881) | 4163.16 (3751.55-4600.87) | 70031861 (63175667-77439162) | 103.202391 | 3936.25 (3555.5-4326.8) | -0.2 (-0.3--0.1) |
| Southeast Asia |  | 53645732 (50112734-57326355) | 16027.12 (15117.46-16984.71) | 124699572 (117426310-132553291) | 132.4501267 | 17217.63 (16289.51-18255.83) | 0.24 (0.24-0.24) |  | 12495760 (11266361-13795016) | 3564.93 (3234.76-3913.6) | 26123646 (23665489-28853065) | 109.0600812 | 3603.66 (3274.49-3956.92) | 0.05 (0.04-0.06) |
| Southern Africa |  | 9846443 (9204868-10475497) | 17001.26 (16014.5-17972.2) | 22486672 (21091874-23931732) | 128.3735558 | 17770.94 (16751.23-18811.8) | 0.15 (0.15-0.16) |  | 2628963 (2380681-2900502) | 4213.55 (3804.94-4621.61) | 5667822 (5127877-6264660) | 115.5915469 | 4187.4 (3784.12-4593.4) | -0.01 (-0.02--0.01) |
| Southern Latin America |  | 11531568 (10887104-12244981) | 24262.11 (22939.79-25733.61) | 19787947 (18726760-20862532) | 71.59806021 | 25148.67 (23751.51-26578.57) | 0.13 (0.1-0.16) |  | 2508067 (2266042-2771009) | 5238.1 (4737.85-5787.73) | 4079107 (3695891-4493815) | 62.63947494 | 5287.59 (4784.2-5833.31) | 0.04 (0.01-0.07) |
| Southern Sub-Saharan Africa |  | 6001563 (5615756-6402454) | 17413.45 (16424.13-18378.85) | 12544406 (11776544-13303921) | 109.0189839 | 18160.09 (17158.91-19148.34) | 0.16 (0.15-0.17) |  | 1542260 (1399405-1694575) | 4199.2 (3798.81-4583.41) | 2940930 (2664910-3244315) | 90.68963729 | 4113.54 (3724.53-4504.5) | -0.05 (-0.05--0.04) |
| Sub-Saharan Africa - WB |  | 51062640 (47594037-54545007) | 16879.49 (15868.16-17879.48) | 127782034 (119089344-136397534) | 150.2456473 | 17525.54 (16516.59-18511.91) | 0.13 (0.12-0.13) |  | 14103837 (12723956-15599174) | 4299.57 (3882.65-4730.57) | 33871844 (30656089-37548128) | 140.1604897 | 4262.42 (3858.91-4678.28) | -0.03 (-0.04--0.02) |
| Tropical Latin America |  | 26795129 (24982910-28681839) | 22339.98 (21049.68-23667.12) | 57930351 (54578454-61323852) | 116.1973208 | 22620.23 (21330.74-23971.49) | -0.05 (-0.1-0) |  | 6329548 (5690180-7028659) | 4982 (4492.81-5515.58) | 12925794 (11648722-14286353) | 104.2135394 | 5130.68 (4631.49-5657.19) | 0.06 (0.04-0.09) |
| Western Africa |  | 17954925 (16771313-19147688) | 16936.68 (15916.01-17904.32) | 46110320 (42984269-49268067) | 156.8115434 | 17649.06 (16619.77-18636.62) | 0.14 (0.13-0.15) |  | 4825461 (4357264-5330003) | 4220.84 (3828.23-4636.31) | 12022194 (10845427-13293596) | 149.1408386 | 4206.64 (3818.75-4616.17) | -0.02 (-0.04-0.01) |
| Western Europe |  | 98977994 (93669172-104566136) | 20517.05 (19375.12-21763.6) | 135587642 (128545464-142549960) | 36.98766415 | 20996.14 (19864.36-22249.51) | 0.08 (0.07-0.09) |  | 24550244 (22223400-26888971) | 5303.21 (4821.58-5816.51) | 31284577 (28166124-34224786) | 27.43081902 | 5204.5 (4702.6-5728.52) | -0.03 (-0.05--0.02) |
| Western Pacific Region |  | 241389278 (226266533-257105657) | 17913.67 (16843.46-18970.39) | 469616285 (444531836-495174222) | 94.54728432 | 18207.95 (17190.16-19251.37) | 0.16 (0.12-0.2) |  | 59295586 (53379198-65472771) | 4269.21 (3857.07-4692.39) | 95641175 (86430109-104507037) | 61.29560639 | 3848.49 (3510.08-4196.51) | -0.21 (-0.26--0.15) |
| Western Sub-Saharan Africa |  | 19859354 (18548449-21183774) | 16964.3 (15955.78-17934.24) | 51644979 (48152188-55185679) | 160.0536704 | 17647.43 (16611.32-18630.18) | 0.13 (0.12-0.14) |  | 5342995 (4827174-5899643) | 4232.25 (3837.17-4650.25) | 13483044 (12177735-14910754) | 152.3499273 | 4209.5 (3819.62-4616.71) | -0.02 (-0.05-0) |
| World Bank High Income |  | 266457228 (252783159-281012774) | 22355.37 (21154.54-23620.71) | 410398696 (393323737-428253627) | 54.02047791 | 23644.39 (22571.76-24784.4) | 0.2 (0.2-0.2) |  | 65935312 (59957986-72386129) | 5661.32 (5133.93-6217.12) | 90156031 (82002995-98010057) | 36.73406293 | 5483.86 (5012.92-6002.51) | -0.06 (-0.08--0.04) |
| World Bank Low Income |  | 31230577 (29090646-33400944) | 16792.11 (15757.95-17856.19) | 74981773 (69733534-80332881) | 140.0908987 | 17336.5 (16288.94-18364.5) | 0.11 (0.1-0.11) |  | 8804397 (7932908-9759808) | 4373.04 (3950.87-4822.02) | 20393723 (18416396-22639439) | 131.6311157 | 4325.67 (3918.54-4751.08) | -0.05 (-0.06--0.04) |
| World Bank Lower Middle Income |  | 256166422 (239892196-273308065) | 18291.16 (17241.14-19404.34) | 593271787 (558414218-630596790) | 131.5962343 | 19296.43 (18247.37-20436.93) | 0.19 (0.16-0.23) |  | 62780597 (56616224-69736231) | 4270.77 (3849.19-4708.62) | 127869425 (115456373-141201181) | 103.676663 | 4079.89 (3696.91-4487.08) | -0.16 (-0.21--0.1) |
| World Bank Upper Middle Income |  | 310339519 (291302682-330514487) | 18214.44 (17164.98-19300.05) | 606546016 (572984837-640342422) | 95.44594835 | 18953.16 (17914.2-20039.15) | 0.2 (0.17-0.23) |  | 77577523 (69981890-85656258) | 4407.28 (3980.16-4851.14) | 128442436 (116082702-140621385) | 65.56655979 | 4145.82 (3773.42-4524.18) | -0.1 (-0.15--0.05) |
|  | | | | | | | | | | | | | | |
| Afghanistan |  | 1247156 (1122875-1362852) | 16845.76 (15085.11-18480.77) | 3180739 (2884458-3480703) | 155.0394289 | 17698.19 (16233.35-19141.94) | 0.16 (0.15-0.16) |  | 369489 (331405-406861) | 4791.83 (4330.63-5261.39) | 982297 (877672-1096699) | 165.8524276 | 4840.67 (4349.02-5338.34) | 0.03 (0.02-0.04) |
| Albania |  | 510278 (467957-552706) | 19221.13 (17781.59-20698.62) | 724582 (677768-769374) | 41.99758589 | 20334.75 (18960.44-21706.78) | 0.2 (0.2-0.21) |  | 169829 (152452-190323) | 6116.16 (5511.26-6798.52) | 209220 (185440-231746) | 23.19493615 | 6189.19 (5548.95-6910.77) | 0.04 (0.04-0.04) |
| Algeria |  | 3102703 (2874529-3343251) | 18521.83 (17294.26-19780.94) | 8528275 (7996742-9074658) | 174.8659758 | 20342.7 (19133.38-21580.46) | 0.3 (0.29-0.31) |  | 881002 (790638-980347) | 4800.54 (4304.67-5300.76) | 2069192 (1876942-2291448) | 134.8681016 | 4864.25 (4396.15-5357.71) | 0.03 (0.02-0.04) |
| American Samoa |  | 5773 (5395-6181) | 18266.3 (17274.73-19379.37) | 9606 (9078-10189) | 66.40840427 | 18896.28 (17907.67-20012.21) | 0.1 (0.08-0.12) |  | 1367 (1236-1514) | 4013.31 (3638.59-4405.68) | 2060 (1859-2276) | 50.69850063 | 4030.02 (3662.5-4437.29) | 0.01 (-0.01-0.03) |
| Andorra |  | 12221 (11446-13059) | 20073.02 (18883.28-21393.67) | 25789 (24271-27419) | 111.0192194 | 20355.78 (19173.61-21742.81) | 0.06 (0.06-0.07) |  | 3111 (2812-3449) | 5134.65 (4633.9-5673.95) | 6057 (5428-6666) | 94.72820119 | 5054.57 (4577.34-5575.52) | -0.03 (-0.04--0.02) |
| Angola |  | 1012983 (940659-1092686) | 17316.44 (16212.54-18454.49) | 3263806 (3016936-3503074) | 222.1976485 | 17864.25 (16695.31-19016.99) | 0.09 (0.08-0.1) |  | 287565 (258386-320372) | 4451.76 (4015.07-4925.09) | 893923 (806995-998160) | 210.8592667 | 4388.05 (3945.66-4848.6) | -0.06 (-0.08--0.04) |
| Antigua and Barbuda |  | 9561 (8976-10156) | 17657.34 (16579.75-18717.06) | 20003 (18755-21207) | 109.214638 | 18634.54 (17489.12-19740.73) | 0.17 (0.17-0.18) |  | 2056 (1864-2263) | 3718.33 (3366.24-4085.43) | 3951 (3571-4321) | 92.18619081 | 3756.82 (3403.05-4108.79) | 0.03 (0.02-0.04) |
| Argentina |  | 7674495 (7221644-8173958) | 23810.27 (22412.19-25379.16) | 12931372 (12226114-13652345) | 68.49802524 | 25109.85 (23692.47-26567.66) | 0.21 (0.19-0.23) |  | 1696128 (1535578-1872943) | 5240.72 (4747.29-5797.76) | 2669675 (2417095-2946497) | 57.39822783 | 5264.7 (4760.57-5803.98) | 0.03 (0-0.05) |
| Armenia |  | 521427 (485124-560113) | 17118.65 (15942.54-18281.05) | 726083 (680599-770867) | 39.24913629 | 18877.56 (17680.4-20121.15) | 0.37 (0.36-0.39) |  | 159276 (142210-177613) | 5112.85 (4574.8-5647.66) | 192776 (171917-213768) | 21.03250385 | 5213.62 (4693.07-5799.61) | 0.09 (0.08-0.1) |
| Australia |  | 4431288 (4197826-4686376) | 23776.94 (22478.45-25187.45) | 8391262 (7998245-8819048) | 89.36397384 | 24435.75 (23112.27-25909.57) | 0.11 (0.08-0.14) |  | 1110293 (1008506-1231505) | 6034.03 (5493.15-6706.11) | 1872234 (1682706-2055630) | 68.62527178 | 5779.25 (5225.21-6342.19) | -0.08 (-0.1--0.06) |
| Austria |  | 1931107 (1823635-2051769) | 19640.59 (18543.64-20955.88) | 2664367 (2523877-2813586) | 37.9709965 | 20207.86 (19040-21490.22) | 0.13 (0.1-0.16) |  | 469742 (425480-515146) | 4973.77 (4520.89-5484.23) | 590221 (532046-644313) | 25.64794141 | 4771.53 (4317.1-5229.65) | -0.04 (-0.07--0.01) |
| Azerbaijan |  | 1024320 (953667-1096313) | 17497.35 (16376.38-18629.45) | 2095599 (1946222-2239290) | 104.5843011 | 18485.54 (17260.29-19690.11) | 0.24 (0.21-0.28) |  | 299659 (268647-334400) | 4927.49 (4446.56-5459.1) | 572118 (512731-639315) | 90.9227278 | 5014.48 (4529.02-5542.98) | 0.09 (0.08-0.11) |
| Bahamas |  | 36469 (34154-38864) | 18180.05 (17114.57-19234.13) | 82325 (77339-87311) | 125.7392969 | 18989.64 (17904.22-20106.34) | 0.15 (0.14-0.15) |  | 8084 (7275-8900) | 3747.99 (3386.09-4106.25) | 16383 (14755-18018) | 102.6687157 | 3782.09 (3423.33-4156.56) | 0.02 (0.01-0.03) |
| Bahrain |  | 69408 (63849-75577) | 19199.3 (18060.46-20434.71) | 311739 (291020-333648) | 349.1409234 | 20275.89 (19156.68-21499.57) | 0.19 (0.18-0.19) |  | 18843 (16834-21185) | 4713.86 (4248.57-5194.42) | 73926 (66391-82491) | 292.3217365 | 4705.23 (4258.45-5186.12) | -0.02 (-0.03--0.01) |
| Bangladesh |  | 14424303 (13553798-15399839) | 21237.35 (20109.01-22432.98) | 35412987 (33367433-37768641) | 145.5091725 | 22639.39 (21418.24-24048.9) | 0.25 (0.22-0.27) |  | 3356775 (3035263-3750163) | 4679.54 (4229.38-5234.99) | 7168980 (6451371-7986341) | 113.5675099 | 4545.43 (4070.47-5052.07) | -0.05 (-0.09--0.02) |
| Barbados |  | 48349 (45591-51165) | 18225.44 (17211.15-19271.17) | 81088 (76887-85786) | 67.71484494 | 19056.02 (17972.32-20218.94) | 0.15 (0.14-0.15) |  | 9918 (8962-10867) | 3781.5 (3424.23-4132.67) | 15121 (13597-16516) | 52.4584962 | 3804.2 (3440.81-4175.45) | 0.02 (0.02-0.03) |
| Belarus |  | 2290207 (2147869-2438465) | 18909.99 (17694.72-20144.96) | 2657038 (2500149-2812166) | 16.01739347 | 19850.22 (18563.78-21079.31) | 0.18 (0.16-0.2) |  | 655173 (585522-724314) | 5550.01 (4988.31-6129.35) | 706141 (631411-777558) | 7.779295256 | 5598.18 (5036.38-6155.16) | 0.04 (0.03-0.05) |
| Belgium |  | 2557703 (2412890-2716107) | 20129.91 (18969.65-21476.48) | 3389181 (3194043-3573731) | 32.50877593 | 20693.38 (19497.08-21982.69) | 0.08 (0.07-0.1) |  | 639608 (576731-706294) | 5252.57 (4749.13-5818.78) | 795006 (712234-867574) | 24.29567418 | 5182.36 (4678.4-5715.53) | -0.04 (-0.05--0.02) |
| Belize |  | 20142 (18823-21526) | 17084.73 (16059.92-18099.67) | 68125 (63792-72709) | 238.2266107 | 18346.43 (17287.06-19524.97) | 0.24 (0.23-0.25) |  | 4844 (4366-5320) | 3724.83 (3373.96-4079.31) | 14961 (13498-16492) | 208.8640291 | 3820.21 (3467.5-4179.43) | 0.09 (0.08-0.1) |
| Benin |  | 452607 (421981-486175) | 16901.86 (15873.84-17962.68) | 1365048 (1270401-1462731) | 201.5965619 | 17597.36 (16588.55-18639.5) | 0.13 (0.12-0.14) |  | 123267 (111152-136579) | 4235.1 (3818.67-4679.67) | 355348 (321411-394134) | 188.2758702 | 4166.37 (3769.73-4581.77) | -0.06 (-0.08--0.03) |
| Bermuda |  | 12222 (11501-12976) | 18620.18 (17523.79-19682.09) | 19754 (18685-20850) | 61.63428824 | 19436.3 (18358.81-20568.61) | 0.15 (0.14-0.15) |  | 2512 (2279-2768) | 3846.24 (3475.88-4220.06) | 3564 (3215-3894) | 41.8737194 | 3853.18 (3491.71-4239.99) | 0 (0-0.01) |
| Bhutan |  | 73443 (68164-79171) | 19246.08 (18148-20440.73) | 150806 (141888-161219) | 105.3367275 | 20878.54 (19684.08-22154.62) | 0.28 (0.27-0.29) |  | 18217 (16269-20270) | 4444.95 (4001.28-4918.95) | 32346 (29050-36080) | 77.56100578 | 4447.02 (3995.21-4926.63) | 0.01 (0-0.02) |
| Bolivia (Plurinational State of) |  | 756641 (704177-809654) | 17791.6 (16679.41-18851.03) | 2040179 (1915369-2171108) | 169.6361952 | 19198.25 (18089.67-20327.56) | 0.24 (0.23-0.25) |  | 171373 (155283-189625) | 3700.21 (3357.51-4065.48) | 417136 (378050-462444) | 143.4076008 | 3811.35 (3456.74-4198.94) | 0.08 (0.06-0.11) |
| Bosnia and Herzegovina |  | 856297 (796442-915981) | 18828.44 (17544.39-20109.98) | 984323 (921801-1046885) | 14.95118675 | 20373.84 (19021.55-21772.75) | 0.29 (0.28-0.3) |  | 271278 (244489-301691) | 5887.12 (5301.97-6506.84) | 273378 (244881-301226) | 0.774325165 | 6055.76 (5468.64-6707.05) | 0.09 (0.08-0.1) |
| Botswana |  | 127018 (118773-135172) | 16613.3 (15647.24-17569.46) | 350177 (327838-373300) | 175.6907536 | 17777.85 (16794.2-18735.2) | 0.22 (0.21-0.23) |  | 32498 (29250-35719) | 3923.64 (3538.27-4293.26) | 82271 (73738-91313) | 153.1544432 | 3983.08 (3582.76-4368.25) | 0.05 (0.05-0.06) |
| Brazil |  | 26221956 (24452761-28071861) | 22391.68 (21097.32-23724.87) | 56512686 (53257321-59829962) | 115.5166663 | 22660.51 (21373.23-24015.98) | -0.05 (-0.1-0) |  | 6198032 (5569289-6885743) | 4998.94 (4506.59-5535.43) | 12622349 (11371534-13946303) | 103.6509136 | 5150.96 (4649.49-5682.03) | 0.06 (0.04-0.09) |
| Brunei Darussalam |  | 39433 (36381-42713) | 21629.19 (20414.26-23022.27) | 105650 (99082-113274) | 167.9199725 | 23040.69 (21815.22-24450.09) | 0.23 (0.21-0.26) |  | 10141 (9051-11277) | 5036.79 (4576.47-5527.09) | 23328 (21043-26030) | 130.0330982 | 4937.13 (4467.22-5435.28) | -0.04 (-0.06--0.03) |
| Bulgaria |  | 2188772 (2039109-2337884) | 20003.67 (18593.79-21428.87) | 2152350 (2016514-2283550) | -1.664064095 | 20617.28 (19275.75-22001.89) | 0.11 (0.1-0.11) |  | 647123 (576312-719166) | 6135.71 (5524.4-6836.63) | 587878 (524612-650216) | -9.155155979 | 6100.27 (5470.13-6742.97) | -0.01 (-0.02--0.01) |
| Burkina Faso |  | 907083 (847208-968294) | 16370.28 (15393.47-17364.18) | 2244607 (2078124-2408058) | 147.4533155 | 16785.06 (15749.16-17822.51) | 0.06 (0.05-0.07) |  | 248394 (225660-274107) | 4176.4 (3797.86-4602.43) | 599176 (539176-664786) | 141.2202619 | 4115.49 (3708.91-4536.64) | -0.08 (-0.11--0.06) |
| Burundi |  | 520031 (484982-559234) | 16422.93 (15365.55-17454.87) | 1144541 (1049529-1237112) | 120.0908712 | 15279.79 (14142.86-16329) | -0.25 (-0.32--0.19) |  | 147027 (132258-164560) | 4298.84 (3863.12-4762.96) | 346032 (309530-384167) | 135.3532888 | 4141.96 (3731.13-4560.76) | -0.15 (-0.16--0.14) |
| Cabo Verde |  | 39405 (36989-41832) | 16750.53 (15703.18-17796.91) | 91403 (86068-97369) | 171.7413028 | 17453.74 (16496.69-18504.04) | 0.13 (0.12-0.14) |  | 10032 (9080-11035) | 4109.37 (3718.7-4521.85) | 21423 (19259-23637) | 155.5977641 | 3984.36 (3596.4-4364.91) | -0.11 (-0.14--0.09) |
| Cambodia |  | 971352 (894055-1045249) | 15652.43 (14591.13-16689.96) | 2449016 (2280940-2635451) | 131.9563947 | 16336.64 (15255.08-17480.36) | 0.14 (0.13-0.15) |  | 246522 (222518-274509) | 3728.95 (3355.65-4115.46) | 548159 (494652-606395) | 113.5462049 | 3594.46 (3252.26-3953.52) | -0.12 (-0.13--0.11) |
| Cameroon |  | 1073575 (998355-1150215) | 17477.42 (16429.1-18512.45) | 3470372 (3210032-3710030) | 152.1243367 | 17963.26 (16870.11-18983.32) | 0.07 (0.07-0.08) |  | 288147 (258791-319166) | 4339.73 (3910.45-4772.16) | 899291 (816655-999905) | 122.3572566 | 4245.34 (3853.77-4690.1) | -0.09 (-0.12--0.07) |
| Canada |  | 7387591 (6951953-7880102) | 24047.14 (22592.94-25637.46) | 12738177 (12085154-13426429) | 223.2537159 | 25037.69 (23600.58-26519) | 0.14 (0.13-0.15) |  | 1562196 (1407293-1740093) | 5130.46 (4638.09-5700.37) | 2388499 (2146414-2614761) | 212.0947888 | 4872.92 (4400.94-5394.72) | -0.1 (-0.13--0.08) |
| Central African Republic |  | 274217 (256154-295081) | 16797.92 (15773.03-17845.7) | 569972 (526976-613773) | 72.42665937 | 16778.24 (15721.2-17798.43) | -0.02 (-0.03--0.01) |  | 77101 (69196-85759) | 4360.41 (3931.18-4798.78) | 161378 (145271-179117) | 52.89374413 | 4324 (3894.65-4756.02) | -0.04 (-0.05--0.03) |
| Chad |  | 610291 (568481-650009) | 17174.72 (16073.01-18200.21) | 1542233 (1427457-1657853) | 107.8546406 | 16957.66 (15884.46-18010) | -0.03 (-0.06--0.01) |  | 172794 (155812-191713) | 4518.82 (4078.74-4986.26) | 433921 (392573-482049) | 109.3076567 | 4296.45 (3882.72-4743) | -0.15 (-0.2--0.1) |
| Chile |  | 3067067 (2840544-3275790) | 25756.09 (24035.99-27373.86) | 5783362 (5467898-6107678) | 152.7046889 | 25281.83 (23883.97-26775.87) | -0.1 (-0.17--0.02) |  | 641600 (580232-710429) | 5285.23 (4767.07-5847.25) | 1188284 (1072031-1306819) | 151.1203081 | 5330.34 (4843.41-5865.88) | 0.03 (0-0.05) |
| China |  | 170594404 (159481066-182116267) | 16966.24 (15950.23-17975.77) | 342123786 (322541900-361025855) | 88.56328236 | 17403.52 (16414.43-18413.98) | 0.21 (0.16-0.26) |  | 42000767 (37804103-46495427) | 4039.14 (3648.56-4437.89) | 68646958 (61976491-74990168) | 85.20645093 | 3629.61 (3307.36-3954.47) | -0.18 (-0.26--0.11) |
| Colombia |  | 4999615 (4665200-5342185) | 20531.59 (19351.32-21754.85) | 12097400 (11378419-12805242) | 100.5480707 | 22215.63 (20900.06-23511.33) | 0.27 (0.26-0.28) |  | 1165781 (1048980-1291970) | 4441.9 (4009.39-4899.12) | 2421092 (2190549-2664519) | 63.44215267 | 4509.32 (4088.95-4977.63) | 0.07 (0.06-0.08) |
| Comoros |  | 42699 (39977-45446) | 15924.75 (15021.85-16844.77) | 101497 (95003-107798) | 141.9666082 | 16789 (15813.49-17738.78) | 0.16 (0.15-0.16) |  | 11691 (10579-12802) | 4025.71 (3651.38-4401.77) | 25579 (23107-28204) | 107.6798644 | 4069.72 (3666.04-4481.29) | 0 (-0.01-0.02) |
| Congo |  | 249299 (234177-267892) | 17271.35 (16311.45-18319.29) | 698808 (649643-748233) | 137.7052178 | 17852.36 (16827.24-18913.8) | 0.09 (0.06-0.12) |  | 66745 (60427-73966) | 4252.14 (3843.43-4663.54) | 179822 (162578-199477) | 118.7816166 | 4270.21 (3867.15-4707.77) | -0.01 (-0.02-0.01) |
| Cook Islands |  | 2642 (2485-2809) | 17861.42 (16883.17-18897.28) | 4367 (4142-4601) | 65.28355513 | 19187.28 (18191.29-20269.73) | 0.23 (0.22-0.24) |  | 608 (550-669) | 3935.76 (3558.33-4336.72) | 891 (801-980) | 46.70300888 | 4077.78 (3712.21-4484.89) | 0.13 (0.12-0.14) |
| Costa Rica |  | 477748 (447421-513545) | 20897.66 (19780.33-22212.65) | 1188670 (1124782-1257681) | 148.8070406 | 22070.93 (20858.37-23331.04) | 0.18 (0.18-0.18) |  | 106011 (95282-117469) | 4343.01 (3899.69-4839.2) | 229740 (208144-253190) | 116.7124722 | 4341.24 (3942.63-4786.33) | 0.01 (0.01-0.01) |
| Croatia |  | 1146072 (1074254-1221338) | 19763.26 (18531.05-21100.23) | 1310671 (1233458-1388685) | 14.36205136 | 20478.64 (19140.34-21835.52) | 0.15 (0.12-0.17) |  | 341760 (308142-379419) | 6032.99 (5469.47-6690.25) | 355541 (316151-392236) | 4.032528952 | 6011.49 (5388.87-6669.39) | 0.01 (-0.03-0.04) |
| Cuba |  | 1824633 (1717219-1929472) | 16919.47 (16005.97-17881.53) | 2968515 (2819155-3131431) | 62.69104576 | 18377.99 (17367.99-19384.03) | 0.29 (0.26-0.31) |  | 408221 (369203-449517) | 3736.71 (3370.64-4108.13) | 556708 (509948-604481) | 36.3742519 | 3670.1 (3365.28-3989.56) | 0.01 (-0.01-0.03) |
| Cyprus |  | 160447 (150980-171434) | 19644.6 (18493.13-21001.72) | 370160 (348696-392516) | 130.7053331 | 20766.74 (19555.68-22094.15) | 0.18 (0.17-0.2) |  | 42167 (37863-46401) | 5169.56 (4637.95-5703.41) | 88205 (79076-97441) | 109.1815376 | 5148.55 (4629.73-5694.34) | -0.01 (-0.02-0) |
| Czechia |  | 2595320 (2429757-2759483) | 21092.66 (19724.01-22535.67) | 3384630 (3175567-3596200) | 30.41279796 | 21608.49 (20153.96-23129.38) | 0.07 (0.07-0.08) |  | 771005 (689649-855484) | 6427.1 (5783.29-7126.77) | 926344 (824743-1024530) | 20.14758001 | 6341.32 (5686.87-7058.82) | -0.05 (-0.05--0.04) |
| Côte d'Ivoire |  | 1131764 (1051600-1218779) | 16995.39 (16015.81-18037.84) | 3075471 (2857040-3297448) | 149.8931827 | 17522.93 (16477.59-18535.42) | 0.09 (0.08-0.1) |  | 313791 (285095-346361) | 4255.19 (3874.4-4671.56) | 802043 (720518-892604) | 146.5360119 | 4187.8 (3776.55-4600.48) | -0.06 (-0.09--0.03) |
| Democratic People's Republic of Korea |  | 3314679 (3102572-3521047) | 17681.31 (16659.83-18669.77) | 5891274 (5542591-6235501) | 22.74871585 | 18023.56 (16934.11-19058.79) | 0.05 (0.05-0.06) |  | 800712 (718229-886194) | 4197.19 (3776.94-4636.9) | 1301826 (1179141-1431794) | 14.41907603 | 4050.54 (3672.68-4448.76) | -0.13 (-0.14--0.12) |
| Democratic Republic of the Congo |  | 3804864 (3544151-4089309) | 17234.72 (16161.82-18378.5) | 9508096 (8811482-10204605) | 327.0558624 | 17167.97 (16145.19-18245.51) | -0.04 (-0.07--0.02) |  | 1061959 (955620-1178082) | 4427.26 (3986.24-4884.39) | 2618110 (2369351-2918966) | 286.7771819 | 4327.77 (3910.29-4768.1) | -0.09 (-0.11--0.08) |
| Denmark |  | 1550075 (1470085-1627620) | 23700.79 (22488.98-24951.88) | 1902697 (1795362-2009220) | 38.08164003 | 22937.27 (21431.18-24525.75) | -0.17 (-0.21--0.12) |  | 347986 (311285-390124) | 5517.61 (4920.6-6164.48) | 398162 (349290-449755) | 23.27027407 | 5093.16 (4481.36-5814.56) | -0.35 (-0.41--0.29) |
| Djibouti |  | 36905 (34282-39794) | 15876.33 (14919.43-16829) | 157604 (147075-168885) | 132.4534442 | 16597.26 (15623.87-17573.07) | 0.17 (0.15-0.19) |  | 10319 (9281-11475) | 4018.08 (3606.03-4412.42) | 39911 (35898-44367) | 107.4101744 | 3948.09 (3561.91-4334.41) | -0.07 (-0.08--0.06) |
| Dominica |  | 10727 (10088-11368) | 17681.39 (16625.49-18694.66) | 14811 (14026-15672) | 162.7873949 | 18590.38 (17575.87-19739) | 0.16 (0.15-0.17) |  | 2376 (2140-2603) | 3793.47 (3423.05-4159.6) | 2929 (2641-3214) | 131.7129794 | 3770.14 (3401.25-4137.92) | -0.04 (-0.05--0.03) |
| Dominican Republic |  | 846822 (789000-904239) | 17105.27 (16110.72-18119.52) | 1968467 (1851342-2083047) | 143.1456737 | 18322.79 (17258.64-19395.74) | 0.23 (0.21-0.24) |  | 200293 (180877-219950) | 3687.52 (3354.98-4024.92) | 415428 (375816-457576) | 121.1739862 | 3811.73 (3441.05-4193.44) | 0.1 (0.08-0.11) |
| Ecuador |  | 1262542 (1181455-1348098) | 18181.83 (17107.65-19227.94) | 3317801 (3133297-3518348) | 85.18484805 | 19076.63 (18050.13-20203.53) | 0.16 (0.12-0.19) |  | 274944 (248622-300089) | 3644.93 (3302.99-3965.78) | 637081 (583277-696686) | 61.11078608 | 3615.95 (3307.85-3950.61) | -0.03 (-0.08-0.03) |
| Egypt |  | 7220735 (6711045-7795130) | 18623.29 (17505.92-19854) | 17556904 (16349580-18841715) | 284.6887706 | 20482.97 (19264.71-21761.17) | 0.29 (0.27-0.31) |  | 2008852 (1810843-2234762) | 4798.43 (4331.41-5311.41) | 4443058 (4017053-4934275) | 257.512515 | 4952.38 (4479.97-5460.32) | 0.1 (0.08-0.12) |
| El Salvador |  | 721108 (668500-773018) | 19445.59 (18107.76-20780.61) | 1335383 (1258138-1418900) | 159.0546965 | 21296.08 (20028.76-22660) | 0.32 (0.31-0.33) |  | 172399 (155018-190859) | 4274.36 (3845.02-4711.28) | 277753 (250599-307112) | 132.1557609 | 4397.07 (3959.71-4868.13) | 0.12 (0.11-0.13) |
| Equatorial Guinea |  | 42892 (39868-46040) | 16743.55 (15704.95-17781.88) | 165001 (152903-177084) | 12.24367155 | 18558.6 (17489.96-19649.2) | 0.39 (0.36-0.41) |  | 11978 (10815-13293) | 4356.49 (3930.37-4793.55) | 42824 (38701-47676) | 1.377959116 | 4330.56 (3914.86-4757.64) | -0.02 (-0.03-0) |
| Eritrea |  | 244382 (219496-268221) | 13671.88 (12492.16-14782.73) | 633082 (571312-686856) | 97.98866351 | 15036.01 (13858.07-16129.39) | 0.32 (0.31-0.32) |  | 77387 (69357-85744) | 3877.37 (3485.54-4265.44) | 179658 (161599-199383) | 82.49210047 | 3915.41 (3524.78-4293.32) | 0.05 (0.04-0.06) |
| Estonia |  | 358418 (336776-379961) | 19033.8 (17864.46-20217.07) | 402301 (379361-425132) | 143.9458971 | 20289.38 (19128.03-21540.7) | 0.25 (0.23-0.26) |  | 101082 (91262-111977) | 5535.83 (5022.63-6126.11) | 102475 (91851-112887) | 126.2394415 | 5585.77 (5025.38-6171.27) | 0.05 (0.04-0.06) |
| Eswatini |  | 67921 (63490-72721) | 16128.78 (15216.27-17111.86) | 134476 (125182-143328) | 77.65091268 | 17145.02 (16170.79-18091.03) | 0.17 (0.15-0.18) |  | 17349 (15723-19036) | 3737.39 (3381.63-4069.93) | 31660 (28678-34933) | 59.23115452 | 3762.23 (3414.12-4121.62) | -0.01 (-0.03-0.01) |
| Ethiopia |  | 4568190 (4229281-4900039) | 16397.36 (15344.03-17441.1) | 11143911 (10366311-11971162) | 39.56080389 | 17243.95 (16199.48-18286.67) | 0.19 (0.15-0.23) |  | 1359513 (1224646-1508820) | 4465.8 (4022.64-4920.17) | 3075754 (2773521-3417450) | 25.82533727 | 4322.58 (3905.65-4751.35) | -0.11 (-0.13--0.08) |
| Fiji |  | 90368 (84409-96713) | 17441.48 (16499.3-18530.73) | 160540 (151271-170503) | 42.96180317 | 18422.25 (17417.31-19486.26) | 0.17 (0.16-0.18) |  | 21845 (19733-24241) | 3912.21 (3523.43-4306.68) | 34784 (31407-38309) | 32.01219968 | 3920.86 (3550.93-4290.53) | 0 (0-0.01) |
| Finland |  | 1175799 (1110549-1248819) | 18778.07 (17739.63-19944.41) | 1640954 (1551354-1736610) | 119.2327039 | 19450.25 (18382.79-20606.99) | 0.15 (0.12-0.19) |  | 294462 (266764-323895) | 4851.45 (4403.42-5307.48) | 370508 (332359-405832) | 107.9560052 | 4743.51 (4287.76-5182.69) | -0.04 (-0.05--0.02) |
| France |  | 13475298 (12711661-14307131) | 19308.61 (18173.99-20563.59) | 19264529 (18240667-20329618) | 185.5555751 | 20195.76 (19001.11-21442.93) | 0.13 (0.11-0.15) |  | 3431038 (3103630-3770093) | 5096.38 (4603.89-5606.94) | 4529389 (4080046-4938317) | 168.3932711 | 5096.1 (4606.76-5594.23) | -0.01 (-0.03-0.01) |
| Gabon |  | 114441 (107002-122116) | 17003.01 (15925.63-18057.7) | 250893 (235652-266815) | -16.22056289 | 18283.3 (17272.88-19305.26) | 0.23 (0.23-0.24) |  | 29802 (26768-32806) | 4204.3 (3777.71-4622.16) | 61976 (56236-68514) | -21.83311281 | 4274.83 (3866.9-4717.57) | 0.05 (0.04-0.06) |
| Gambia |  | 87899 (81559-94099) | 16414.35 (15433.94-17392.28) | 251002 (233100-269040) | 25.04521939 | 17327.36 (16279.76-18354.9) | 0.17 (0.16-0.19) |  | 23759 (21483-26188) | 4015.5 (3624.22-4419.26) | 63768 (57929-70354) | 15.97624892 | 4009.62 (3639.47-4383.35) | -0.01 (-0.04-0.02) |
| Georgia |  | 1016119 (952535-1080482) | 16780.23 (15743.24-17863.33) | 851299 (797284-905103) | 174.7499977 | 17180.8 (16069.76-18330.4) | 0.02 (-0.01-0.06) |  | 283891 (255269-313142) | 4764.96 (4292.39-5227.5) | 221909 (198643-243603) | 157.7448623 | 4762.87 (4288.52-5277.1) | -0.06 (-0.09--0.03) |
| Germany |  | 22987873 (21685927-24373697) | 22044.98 (20693.96-23517.35) | 28745236 (27309615-30209143) | 28.35210492 | 22274.6 (21059.55-23703.18) | 0.07 (0.05-0.08) |  | 5773153 (5199112-6393498) | 5790.87 (5214.63-6417.93) | 6695486 (6021743-7364257) | 15.99378311 | 5601.62 (5050.48-6196.42) | -0.06 (-0.08--0.05) |
| Ghana |  | 1525092 (1422309-1627947) | 17263.33 (16217.97-18281.12) | 4190191 (3920954-4466182) | 37.75855213 | 17707.46 (16727.18-18726.1) | 0.09 (0.06-0.12) |  | 390786 (355464-430640) | 4047.14 (3671.96-4412.74) | 1007231 (916864-1100959) | 20.92878941 | 3952.26 (3612.59-4300.57) | -0.09 (-0.1--0.08) |
| Greece |  | 2562121 (2419965-2708661) | 19755.11 (18610.81-20970.53) | 3288536 (3112641-3465066) | 77.82046937 | 20800.78 (19639.55-22124.37) | 0.25 (0.19-0.31) |  | 635045 (571133-694749) | 5076.11 (4583.06-5571.6) | 736612 (662770-808482) | 60.89900437 | 5063.15 (4582.7-5603.06) | 0.02 (-0.01-0.04) |
| Greenland |  | 11678 (10808-12569) | 22675.65 (21296.79-24158.09) | 16087 (15142-17068) | 91.05510324 | 24263.14 (22803.77-25806.27) | 0.26 (0.25-0.27) |  | 2591 (2312-2913) | 4939.07 (4436.74-5509.95) | 3134 (2797-3476) | 68.58942117 | 4794.53 (4315.88-5316.06) | -0.04 (-0.07--0.01) |
| Grenada |  | 11922 (11219-12663) | 17075.12 (16047.23-18107.08) | 21199 (19938-22481) | 179.9139422 | 18317.04 (17257.77-19439.42) | 0.22 (0.21-0.24) |  | 2671 (2422-2924) | 3727.62 (3374.57-4072.68) | 4297 (3872-4727) | 145.6469003 | 3753.08 (3408.5-4114.35) | 0.03 (0.01-0.04) |
| Guam |  | 19090 (17858-20376) | 18001.39 (16998.98-19070.17) | 36472 (34521-38485) | 109.8827309 | 18932.93 (17884.93-20008.44) | 0.17 (0.16-0.19) |  | 4382 (3959-4882) | 3913.79 (3546.89-4309.33) | 7388 (6681-8100) | 109.0987311 | 3965.81 (3609.9-4348.71) | 0.05 (0.04-0.06) |
| Guatemala |  | 1020233 (946629-1092365) | 20262.98 (19020.16-21445.04) | 2855775 (2657009-3053158) | 119.5261786 | 21328.16 (19967.01-22657.34) | 0.19 (0.17-0.21) |  | 261538 (235622-289555) | 4648.2 (4199.76-5133.9) | 642459 (577247-709348) | 112.4794115 | 4580.92 (4127.61-5065.14) | -0.02 (-0.05-0.01) |
| Guinea |  | 653003 (609416-697738) | 16566.7 (15504.47-17578.39) | 1370540 (1274368-1468541) | 45.40844282 | 17099.87 (16062.44-18168) | 0.07 (0.06-0.09) |  | 173993 (156624-192350) | 4188.26 (3756.88-4605.66) | 363817 (329384-402629) | 28.19621068 | 4175.2 (3769.76-4604.41) | -0.04 (-0.07--0.02) |
| Guinea-Bissau |  | 91743 (85063-98514) | 16338.99 (15307.66-17410.28) | 201401 (186763-217314) | 141.4395996 | 16895.97 (15919.61-17986.48) | 0.09 (0.09-0.1) |  | 25187 (22718-27928) | 4094.74 (3687.94-4498.16) | 53517 (48184-59587) | 132.0870756 | 4060.48 (3671.46-4465.37) | -0.05 (-0.07--0.02) |
| Guyana |  | 89822 (83898-96472) | 16930.84 (15891.78-17931.32) | 130608 (122111-138462) | 207.3621451 | 18075.01 (16976.69-19135.77) | 0.21 (0.21-0.21) |  | 21633 (19490-23949) | 3702.94 (3352.64-4069.85) | 27733 (24989-30497) | 179.1351531 | 3753.7 (3386.07-4116.41) | 0.04 (0.04-0.04) |
| Haiti |  | 680031 (632136-731179) | 15927.42 (14898.22-16938.45) | 1641864 (1525239-1768620) | 15.0291134 | 16489.55 (15415.6-17584.67) | 0.08 (0.05-0.11) |  | 169660 (152483-187608) | 3646.51 (3287.41-4017.39) | 393759 (354374-437158) | 6.133861154 | 3676.39 (3316.94-4038.7) | 0.01 (0-0.02) |
| Honduras |  | 568175 (528815-609956) | 19808.74 (18626.79-21075.69) | 1746354 (1634089-1872065) | 72.02872346 | 21217.9 (19979.9-22520.48) | 0.23 (0.23-0.24) |  | 136583 (122792-151662) | 4270.56 (3824.37-4720.2) | 381251 (344825-422985) | 57.47309309 | 4367.54 (3935.05-4824.41) | 0.08 (0.08-0.09) |
| Hungary |  | 2771427 (2590190-2962466) | 21623.89 (20113.34-23126.42) | 3187948 (2993490-3371467) | 130.6513946 | 22308.31 (20934.38-23766.85) | 0.1 (0.1-0.11) |  | 816122 (732963-903728) | 6563.64 (5911.65-7286.21) | 866182 (774948-957874) | 95.13742667 | 6517.02 (5871.34-7216.37) | -0.03 (-0.03--0.02) |
| Iceland |  | 56618 (53365-60059) | 21192.82 (19948.31-22517.34) | 97399 (92467-102420) | 131.6356811 | 21394.01 (20202.37-22639.08) | 0.02 (0.01-0.03) |  | 14380 (12937-15917) | 5435.24 (4875.01-6022.26) | 22645 (20396-24804) | 105.4858099 | 5225.32 (4728.56-5778.24) | -0.14 (-0.15--0.13) |
| India |  | 117437670 (109944814-125857855) | 18951.04 (17827.82-20149.4) | 270871622 (254347708-289521309) | 157.1283852 | 19948.28 (18827.11-21238.05) | 0.19 (0.13-0.26) |  | 26582566 (23856297-29483502) | 4129.65 (3718.88-4549.42) | 51872535 (46801019-57195296) | 114.7008699 | 3796.17 (3435.7-4165.15) | -0.31 (-0.44--0.18) |
| Indonesia |  | 21692572 (20207488-23259211) | 16391.03 (15445.88-17380.31) | 50247737 (47340635-53509979) | 216.1563077 | 17698.77 (16758.07-18770.71) | 0.26 (0.25-0.27) |  | 5268747 (4740405-5840495) | 3781.06 (3413.26-4168.53) | 10826528 (9822394-12014198) | 180.0779771 | 3788.63 (3438.91-4152.79) | 0.04 (0.02-0.05) |
| Iran (Islamic Republic of) |  | 7371106 (6793288-7949586) | 19994.42 (18630.94-21340.62) | 18953207 (17701035-20235028) | 77.12843028 | 21020.76 (19740.11-22354.05) | 0.2 (0.16-0.25) |  | 2272331 (2041700-2513487) | 5652.63 (5082.39-6229.32) | 4878715 (4409154-5426805) | 63.6862465 | 5402.43 (4878.71-5935.39) | -0.11 (-0.15--0.07) |
| Iraq |  | 2025329 (1871800-2198775) | 17864.38 (16606.43-19102.65) | 6403204 (5911772-6913096) | 125.1268486 | 19218.78 (17873.25-20560.1) | 0.21 (0.19-0.22) |  | 610590 (548226-674969) | 4839.41 (4354.42-5337.23) | 1710127 (1545667-1897169) | 109.5862367 | 4838.77 (4377.19-5322.85) | 0 (-0.01-0) |
| Ireland |  | 775165 (729836-822106) | 20593.56 (19366.38-21902.26) | 1373037 (1299134-1445000) | 34.70190448 | 21455.73 (20325.49-22696.58) | 0.11 (0.1-0.12) |  | 197895 (178788-218938) | 5290.24 (4775.66-5853.51) | 323926 (293528-355128) | 23.42150788 | 5284.69 (4789.13-5827.77) | -0.04 (-0.05--0.02) |
| Israel |  | 990665 (933470-1051974) | 20897.78 (19718.22-22173.06) | 2230254 (2106330-2354535) | 73.80857747 | 21196.35 (19973.41-22467.43) | -0.05 (-0.09-0) |  | 256824 (231054-284388) | 5377.66 (4851.09-5957.2) | 538268 (482490-592414) | 57.13213164 | 5234.37 (4682.75-5790.36) | -0.1 (-0.13--0.08) |
| Italy |  | 15137546 (14276895-16042503) | 20481.96 (19220.21-21824.52) | 20390563 (19318842-21445146) | 37.48063649 | 21361.65 (20112.92-22697.9) | 0.14 (0.13-0.16) |  | 3832163 (3427423-4197647) | 5410.08 (4884.15-5970.08) | 4729713 (4257515-5186299) | 17.30448861 | 5388.27 (4857.59-5937.96) | -0.04 (-0.05--0.03) |
| Jamaica |  | 330361 (309916-351662) | 17482.47 (16443.74-18549.47) | 574196 (540573-608842) | 412.0314955 | 18565.46 (17496.14-19689.5) | 0.2 (0.19-0.21) |  | 74524 (67607-82119) | 3774.95 (3403.35-4147.99) | 117102 (105602-128596) | 346.9080526 | 3825.61 (3448.8-4201.16) | 0.03 (0.01-0.04) |
| Japan |  | 37997868 (35843742-40142169) | 24498.26 (23082.58-25990.49) | 52239710 (49716244-54652301) | 44.91492467 | 25014.49 (23656.42-26455.05) | 0.17 (0.11-0.22) |  | 9193153 (8300235-10102428) | 6099.41 (5498.77-6730.91) | 10783981 (9717816-11767839) | 34.2180601 | 5783.39 (5231.48-6375.02) | -0.09 (-0.13--0.05) |
| Jordan |  | 429341 (396721-465805) | 19404.1 (18142.59-20625.19) | 2198363 (2052991-2354081) | 188.303989 | 20825.51 (19618.66-22031.76) | 0.24 (0.23-0.25) |  | 121472 (109348-134378) | 4861.03 (4379-5361.25) | 542867 (490329-601790) | 169.0426917 | 4901.05 (4428.8-5383.65) | 0.03 (0.02-0.04) |
| Kazakhstan |  | 2485323 (2324679-2660950) | 17612.7 (16542.34-18767.16) | 3601605 (3364484-3842850) | 101.0908965 | 18932.3 (17768.65-20126.26) | 0.23 (0.21-0.26) |  | 735093 (667932-811813) | 5044.74 (4575.02-5537.13) | 986628 (886447-1097606) | 92.54849622 | 5129.89 (4639.85-5675.28) | 0.04 (0.02-0.06) |
| Kenya |  | 2109098 (1962991-2262010) | 17461.98 (16405.98-18484.93) | 6080614 (5673357-6487414) | 326.4862552 | 18330.37 (17318.44-19392.43) | 0.15 (0.15-0.16) |  | 610447 (549763-677036) | 4591.49 (4136.37-5064.05) | 1642363 (1484006-1824080) | 283.8304421 | 4583.86 (4140.87-5054.67) | -0.01 (-0.02-0) |
| Kiribati |  | 8473 (7922-9074) | 17345.5 (16291.31-18432.05) | 17039 (15989-18196) | 78.64289722 | 18271.59 (17295.14-19330.25) | 0.17 (0.15-0.18) |  | 2062 (1866-2283) | 3938.98 (3578.76-4320.68) | 3970 (3578-4389) | 68.78269133 | 4047.19 (3653.49-4436.61) | 0.12 (0.1-0.14) |
| Kuwait |  | 246096 (229830-263967) | 19502.97 (18495.9-20605.55) | 1049566 (976101-1127911) | 144.1072631 | 21227 (20041.6-22461.04) | 0.33 (0.3-0.36) |  | 63740 (56954-71229) | 4637.47 (4208.34-5078.81) | 244653 (220108-274957) | 118.1333093 | 4883.45 (4424.07-5369.87) | 0.19 (0.16-0.22) |
| Kyrgyzstan |  | 594128 (556417-634647) | 17520.67 (16393.08-18645.06) | 1061368 (989558-1136785) | -4.669627401 | 18360.68 (17129.34-19569.49) | 0.18 (0.15-0.2) |  | 177851 (160052-198465) | 5039.58 (4533.19-5586.23) | 300182 (269679-335064) | -14.09945453 | 4994.87 (4492.33-5552.46) | -0.02 (-0.03--0.01) |
| Lao People's Democratic Republic |  | 410628 (383999-440775) | 15422.7 (14551-16407.03) | 1002372 (936696-1071380) | 168.065801 | 16525.61 (15551.18-17523) | 0.24 (0.22-0.25) |  | 99824 (90328-109468) | 3545.97 (3223.97-3882.4) | 217749 (196594-242091) | 134.065129 | 3480.89 (3143.07-3838.11) | -0.06 (-0.07--0.04) |
| Latvia |  | 608974 (571851-646159) | 18709.5 (17541.33-19904.58) | 580537 (549051-613787) | 41.31700103 | 19907.28 (18678.15-21152.9) | 0.23 (0.22-0.24) |  | 172395 (154440-190490) | 5491.57 (4940.36-6068.73) | 148089 (131737-163394) | 34.36323765 | 5520.96 (4971.07-6119.67) | 0.02 (0.01-0.02) |
| Lebanon |  | 455637 (414377-493144) | 18227.91 (16660.74-19636.75) | 1221406 (1143060-1303876) | 136.5595367 | 20422.24 (19150.04-21778.27) | 0.4 (0.39-0.41) |  | 123620 (111031-136733) | 4778.96 (4328.18-5247.49) | 289351 (261930-319457) | 134.6043141 | 4866.13 (4402.14-5358.89) | 0.09 (0.08-0.1) |
| Lesotho |  | 165098 (154221-175687) | 16370.84 (15379.99-17333.35) | 233312 (218424-248798) | 177.8366123 | 16985.68 (16017.73-17942.39) | 0.11 (0.1-0.12) |  | 42265 (38248-46448) | 3969.35 (3575.2-4352.38) | 56789 (51289-62592) | 140.8886825 | 3911.26 (3532.94-4283.75) | -0.07 (-0.09--0.06) |
| Liberia |  | 247654 (231585-264647) | 16639.55 (15675.83-17637.47) | 585849 (542850-630102) | 5.975236954 | 17059.9 (16001.24-18137.92) | 0.11 (0.09-0.13) |  | 66034 (59560-73247) | 4123.35 (3726.62-4541.61) | 154918 (138657-172900) | -5.317940827 | 4077.07 (3684.8-4514.04) | -0.05 (-0.06--0.04) |
| Libya |  | 508270 (473052-548328) | 18792.5 (17628.85-20019.57) | 1412161 (1317717-1515505) | 88.83229354 | 20244.64 (19047.41-21549.13) | 0.23 (0.2-0.26) |  | 143440 (129010-158289) | 4785.35 (4323.4-5274.35) | 345530 (310325-385333) | 76.19981817 | 4873.82 (4395.17-5376.99) | 0.04 (0.03-0.05) |
| Lithuania |  | 802896 (752497-853153) | 18959.08 (17774.25-20167.01) | 850870 (803731-899887) | 53.92158441 | 20029.5 (18843.11-21202.16) | 0.2 (0.19-0.2) |  | 229988 (206485-253988) | 5570.67 (5027.31-6177.78) | 217757 (195134-240361) | 40.90064396 | 5576.44 (5042.05-6146.37) | 0 (-0.01-0.01) |
| Luxembourg |  | 96269 (90626-102412) | 20127.27 (18976.44-21449.44) | 181787 (171950-191916) | 153.8965161 | 20862.91 (19729.28-22141.32) | 0.12 (0.1-0.13) |  | 24333 (21964-26881) | 5270.96 (4767.59-5852.61) | 42874 (38748-47124) | 143.9659069 | 5163.96 (4688.52-5707.71) | -0.07 (-0.07--0.06) |
| Madagascar |  | 1147010 (1067055-1234369) | 16489.33 (15494.23-17545.19) | 2912218 (2707611-3136534) | 115.7009401 | 16532.82 (15572.69-17527.09) | 0 (-0.01-0) |  | 323651 (289649-360459) | 4315.13 (3872.9-4777.92) | 789598 (709108-883351) | 108.6021136 | 4139.41 (3728.11-4571.15) | -0.16 (-0.17--0.14) |
| Malawi |  | 892755 (832613-953080) | 16282 (15305.01-17208.43) | 1925681 (1800296-2072917) | 172.7846945 | 16925.41 (15886.04-17962.64) | 0.13 (0.13-0.14) |  | 250650 (225826-275747) | 4207.92 (3816.46-4627.44) | 522861 (468943-581777) | 143.1469561 | 4199.55 (3775.93-4649.08) | -0.02 (-0.03--0.01) |
| Malaysia |  | 2059281 (1929687-2201806) | 16362.56 (15416.32-17338.07) | 5617403 (5286862-6012830) | 335.5139786 | 17626.21 (16622.88-18740.4) | 0.21 (0.2-0.23) |  | 455816 (416629-498323) | 3432.47 (3146.16-3730.75) | 1108302 (1003975-1220685) | 278.0561548 | 3454.2 (3136.76-3782.47) | -0.03 (-0.06--0.01) |
| Maldives |  | 19535 (18157-20929) | 15492.79 (14565.93-16501.14) | 85079 (78965-91508) | 162.203361 | 16793.21 (15827.94-17914.19) | 0.26 (0.23-0.29) |  | 4503 (4059-4966) | 3311.02 (2999.26-3649.08) | 17024 (15366-18966) | 164.72482 | 3261.54 (2961.29-3581.15) | -0.04 (-0.07--0.02) |
| Mali |  | 806004 (753851-862318) | 15512.19 (14583.79-16491.74) | 2113369 (1954587-2270393) | 66.9292692 | 16245.51 (15259.77-17262.86) | 0.14 (0.12-0.15) |  | 212225 (190673-233470) | 3803.5 (3446.56-4155.82) | 561811 (508258-619967) | 51.05423727 | 3904.37 (3531.62-4279.37) | 0.06 (0.04-0.07) |
| Malta |  | 84852 (79513-90435) | 20593.02 (19384.27-21955.66) | 141642 (133785-148777) | 103.7752784 | 21223.57 (20060.04-22540.61) | 0.06 (0.05-0.08) |  | 21813 (19668-24143) | 5355.87 (4841.04-5917.13) | 32949 (29712-36075) | 83.73480958 | 5321.91 (4827.92-5869.77) | -0.05 (-0.06--0.03) |
| Marshall Islands |  | 4003 (3718-4296) | 16887.57 (15969.3-17911.92) | 8157 (7628-8734) | 138.1771377 | 17672.2 (16673.73-18708.42) | 0.13 (0.13-0.14) |  | 1013 (908-1127) | 3822.72 (3453.84-4208.5) | 1861 (1692-2065) | 126.9400557 | 3822.88 (3483.79-4203.68) | -0.01 (-0.01-0) |
| Mauritania |  | 207620 (193942-221479) | 16355.45 (15421.79-17318.98) | 494503 (461478-528023) | 96.22642069 | 17398.86 (16376.32-18447.03) | 0.18 (0.16-0.19) |  | 53317 (48313-58647) | 3908.78 (3555.76-4267.72) | 120997 (109580-133490) | 70.91513221 | 3959.16 (3599.7-4336.99) | 0 (-0.02-0.02) |
| Mauritius |  | 155718 (145945-166007) | 17136.27 (16194.89-18159.49) | 305560 (288483-324911) | 143.5085379 | 18060.12 (17030.66-19190.34) | 0.18 (0.17-0.19) |  | 34098 (30895-37597) | 3624.04 (3293.6-3977.42) | 58279 (52282-64327) | 117.3638537 | 3561.33 (3220.16-3926.43) | -0.02 (-0.05-0) |
| Mexico |  | 12485047 (11628786-13397860) | 21191.14 (19966.44-22456.7) | 30402155 (28654929-32199539) | 50.99817528 | 22585.91 (21331.03-23894.53) | 0.15 (0.12-0.19) |  | 2739253 (2468970-3029583) | 4235.06 (3838.9-4659.38) | 5954146 (5385137-6567772) | 38.83399747 | 4400.67 (3982.48-4836.62) | 0.12 (0.06-0.19) |
| Micronesia (Federated States of) |  | 10759 (10044-11544) | 17220.19 (16222.33-18326.12) | 16246 (15254-17339) | 21.10500078 | 18192.55 (17164.35-19334.98) | 0.17 (0.15-0.19) |  | 2672 (2405-2934) | 3942.78 (3579.55-4314.32) | 3709 (3336-4109) | 7.991454729 | 4023.79 (3658.33-4441.28) | 0.07 (0.05-0.09) |
| Monaco |  | 9968 (9434-10546) | 20939.84 (19738.91-22271.96) | 13129 (12444-13847) | 31.71790652 | 21071.49 (19906.51-22384.88) | 0.02 (0.02-0.03) |  | 2281 (2052-2506) | 5195.53 (4715.35-5757.05) | 2881 (2581-3172) | 26.33709626 | 5081.53 (4554.02-5580.45) | -0.06 (-0.07--0.05) |
| Mongolia |  | 233028 (216202-250272) | 16866.31 (15783.88-17921.41) | 519516 (480208-558277) | 122.9415542 | 18095.33 (16848.24-19334.42) | 0.23 (0.22-0.25) |  | 73489 (66091-81779) | 4936.28 (4458.63-5461.53) | 150054 (135101-167421) | 104.1867201 | 4964.94 (4469.3-5471.58) | 0 (0-0.01) |
| Montenegro |  | 129996 (120916-138843) | 20203.86 (18825.08-21531.56) | 172801 (161731-184088) | 32.92827964 | 21022.13 (19610.66-22472.08) | 0.16 (0.15-0.17) |  | 39496 (35327-44067) | 6128.24 (5490.79-6803.32) | 48459 (43283-53556) | 22.69519364 | 6185.52 (5575.29-6870.51) | 0.04 (0.03-0.05) |
| Morocco |  | 3632672 (3384472-3900742) | 19585.83 (18388.03-20834.01) | 7843537 (7351602-8345461) | 115.9164674 | 20852.76 (19594.95-22145.3) | 0.21 (0.18-0.24) |  | 1029795 (934925-1139363) | 5184.53 (4701.31-5721.08) | 1962067 (1763001-2173494) | 90.52989794 | 5203.16 (4674.25-5747.29) | 0.02 (-0.03-0.07) |
| Mozambique |  | 1292031 (1193908-1384366) | 16014.86 (14981.04-17020.89) | 2876641 (2655418-3098066) | 122.6449809 | 16759.61 (15687.57-17870.41) | 0.15 (0.13-0.17) |  | 374952 (337662-419913) | 4316.77 (3900.45-4768.52) | 815494 (728361-907173) | 117.4927639 | 4318.09 (3869.39-4773.24) | 0.01 (0-0.01) |
| Myanmar |  | 4222753 (3933295-4541239) | 14528.48 (13680.4-15539.77) | 8714235 (8180279-9301374) | 106.3638405 | 16048.52 (15092.32-17083.54) | 0.34 (0.32-0.35) |  | 965046 (869352-1069148) | 3167.52 (2866.59-3483.87) | 1777524 (1613216-1961925) | 84.19056619 | 3248.67 (2954.91-3562.54) | 0.06 (0.05-0.08) |
| Namibia |  | 139748 (130186-149197) | 16307.63 (15350.74-17271.77) | 316120 (294430-335774) | 126.2074594 | 17381.31 (16362.82-18354.01) | 0.21 (0.2-0.23) |  | 36439 (33115-40022) | 3976.09 (3607.1-4357.3) | 76731 (69413-84409) | 110.5733585 | 4008.47 (3632.32-4363.16) | 0.05 (0.04-0.06) |
| Nauru |  | 1128 (1051-1208) | 17251.64 (16248.68-18311.54) | 1441 (1349-1536) | 27.80780237 | 18414.19 (17343.97-19493.77) | 0.21 (0.2-0.22) |  | 277 (251-308) | 3908.94 (3547.74-4299.5) | 340 (308-374) | 22.56841906 | 4057.43 (3693.96-4430.8) | 0.13 (0.11-0.14) |
| Nepal |  | 2737379 (2552088-2946752) | 20946.72 (19614.98-22293.61) | 6046928 (5672346-6469675) | 120.90211 | 21964.03 (20659.65-23375.35) | 0.19 (0.16-0.22) |  | 700269 (626939-786819) | 5083.45 (4561.01-5692.51) | 1378225 (1233452-1550272) | 96.81380236 | 4921.41 (4420.83-5509.79) | -0.07 (-0.11--0.03) |
| Netherlands |  | 3593733 (3396806-3784482) | 20086.1 (18943.64-21216.7) | 5125619 (4854952-5410529) | 42.62659891 | 20230.82 (19094.34-21475.11) | 0.02 (0-0.03) |  | 840787 (757384-923131) | 4843.6 (4365.96-5327.9) | 1126782 (1009209-1228253) | 34.01507819 | 4759.04 (4304.28-5226.36) | -0.03 (-0.07-0.02) |
| New Zealand |  | 797775 (747577-851668) | 21480.26 (20133.25-22995.43) | 1486083 (1408248-1571669) | 86.27848991 | 21870.17 (20613.96-23298.89) | 0.11 (0.09-0.14) |  | 230188 (208062-255129) | 6275.52 (5684.66-6957.96) | 385162 (349507-424101) | 67.32529224 | 6042.01 (5470.47-6696.9) | -0.08 (-0.1--0.05) |
| Nicaragua |  | 446867 (411156-481558) | 19538.97 (18212.83-20810.01) | 1253213 (1170714-1338645) | 180.4442045 | 21087.36 (19856.43-22407.75) | 0.25 (0.24-0.25) |  | 112087 (100843-124215) | 4332.93 (3913.86-4811.58) | 269128 (243052-299560) | 140.1054954 | 4365.56 (3927.82-4834.4) | 0.05 (0.04-0.05) |
| Niger |  | 676681 (625814-729278) | 15995.5 (14977.95-17001.57) | 2079519 (1930423-2234602) | 207.3113773 | 16524.88 (15528.48-17533.61) | 0.13 (0.12-0.14) |  | 189826 (170982-209882) | 4065.8 (3670.43-4459.07) | 577964 (521563-639160) | 204.4708213 | 4130.27 (3727.38-4561.11) | 0.08 (0.05-0.1) |
| Nigeria |  | 9859334 (9211983-10527036) | 17222.64 (16185.75-18257.5) | 24853838 (23125022-26622471) | 152.0843585 | 18129.92 (17103.17-19165.64) | 0.18 (0.17-0.2) |  | 2653168 (2393768-2937253) | 4322.41 (3908.85-4758.17) | 6525385 (5888517-7228896) | 145.9469416 | 4340.86 (3930.88-4777.27) | 0.02 (-0.01-0.05) |
| Niue |  | 374 (354-397) | 17755.83 (16763.64-18837.64) | 378 (358-400) | 1.025752192 | 18751.39 (17754.16-19860.23) | 0.18 (0.17-0.19) |  | 83 (75-91) | 3941.29 (3551.53-4329.29) | 78 (70-86) | -6.240730829 | 3986.14 (3621.62-4370.93) | 0.05 (0.04-0.06) |
| North Macedonia |  | 380686 (353561-408905) | 19033.94 (17717.48-20389.04) | 585957 (547071-624705) | 77.73284705 | 19900.37 (18567.57-21241.2) | 0.17 (0.16-0.17) |  | 118072 (105853-132177) | 5848.25 (5256.4-6515.91) | 166364 (147546-183693) | 62.58345143 | 5865.87 (5268.3-6497.99) | 0.02 (0.01-0.03) |
| Northern Mariana Islands |  | 5996 (5543-6483) | 17914.21 (16905-19019.32) | 10509 (9886-11166) | 75.25238845 | 18603.22 (17583.52-19728.68) | 0.09 (0.06-0.11) |  | 1437 (1288-1608) | 3925.12 (3568.89-4313.65) | 2211 (1992-2462) | 53.86137739 | 3955.58 (3590.82-4373.03) | 0.01 (-0.02-0.03) |
| Norway |  | 1041671 (983352-1102146) | 19347.38 (18200.17-20561.94) | 1488340 (1409358-1570832) | 42.88003471 | 19640.32 (18588.99-20811.37) | 0 (-0.03-0.03) |  | 265049 (238640-291134) | 5156.43 (4658-5698.39) | 356587 (320312-390923) | 34.53667609 | 5012.99 (4534.57-5509.4) | -0.17 (-0.19--0.14) |
| Oman |  | 217977 (200326-239536) | 17510.22 (16399.76-18734.79) | 795556 (735181-861831) | 264.972392 | 19764.61 (18618.86-20953.06) | 0.42 (0.41-0.44) |  | 64297 (57728-71755) | 4614.85 (4155.72-5085.07) | 199110 (178781-223287) | 209.673303 | 4672.8 (4241.49-5153.58) | 0.05 (0.04-0.06) |
| Pakistan |  | 12001510 (11203646-12875336) | 16848.19 (15822.9-17994.34) | 32725529 (30480052-35285788) | 172.6784233 | 19066.96 (17905.08-20304.31) | 0.45 (0.42-0.49) |  | 2944324 (2626561-3287740) | 3909.35 (3474.73-4340.59) | 7697156 (6852934-8637328) | 161.423507 | 4261.62 (3792.92-4737.75) | 0.35 (0.31-0.39) |
| Palau |  | 2143 (2009-2291) | 17583.53 (16619.19-18642.43) | 4341 (4101-4612) | 102.5307758 | 18289.89 (17279.25-19422.46) | 0.12 (0.11-0.14) |  | 502 (454-556) | 3919.4 (3549.63-4299.68) | 912 (826-1008) | 81.60424782 | 3926.82 (3592.09-4296.83) | 0.01 (0-0.03) |
| Palestine |  | 218420 (202114-237023) | 18293.79 (17030.17-19619.14) | 733007 (678164-792214) | 235.5951889 | 19464.4 (18215.28-20796.01) | 0.17 (0.15-0.19) |  | 65570 (59276-72677) | 4893.04 (4415.31-5407.76) | 197753 (178274-219598) | 201.5892725 | 4856.57 (4373.7-5341.51) | -0.02 (-0.02--0.02) |
| Panama |  | 382595 (358730-409704) | 20416.93 (19272.21-21680.94) | 964051 (909313-1020760) | 151.9767282 | 21877.79 (20630.32-23182.6) | 0.22 (0.21-0.22) |  | 83778 (75334-93015) | 4202.37 (3786.44-4665.64) | 188509 (169745-207500) | 125.0108081 | 4285.47 (3868.19-4713.5) | 0.06 (0.05-0.08) |
| Papua New Guinea |  | 411791 (384016-441999) | 15919.16 (14980.54-16884.18) | 1211786 (1127131-1299183) | 194.2720267 | 16457.99 (15473.17-17494.05) | 0.1 (0.1-0.11) |  | 104895 (93939-116334) | 3767.01 (3399.23-4141.21) | 297655 (267944-329997) | 183.7644117 | 3790.72 (3428.63-4177.28) | 0.03 (0.01-0.04) |
| Paraguay |  | 573172 (537662-611786) | 20209.26 (19074.39-21426.2) | 1417665 (1328306-1511466) | 147.3366442 | 21193.31 (19977.94-22497.99) | 0.14 (0.13-0.14) |  | 131515 (119001-144473) | 4295.96 (3893.64-4698.11) | 303445 (272984-335745) | 130.7298929 | 4429.64 (3994-4902.41) | 0.09 (0.05-0.13) |
| Peru |  | 2773041 (2589377-2967552) | 18106.97 (17020.88-19290.87) | 7022828 (6624856-7452137) | 153.2536544 | 19528.13 (18487.18-20703.41) | 0.26 (0.25-0.27) |  | 593006 (537379-654757) | 3575.78 (3232.14-3925.26) | 1350653 (1227666-1488094) | 127.763675 | 3723.27 (3383.31-4090.06) | 0.16 (0.15-0.17) |
| Philippines |  | 6585421 (6113911-7053711) | 16006.41 (15078.61-16988.66) | 16525027 (15451027-17596077) | 150.933501 | 16810.54 (15857.01-17815.29) | 0.13 (0.12-0.14) |  | 1639253 (1481159-1818700) | 3713.75 (3359.4-4083.67) | 3760921 (3398244-4152387) | 129.4288966 | 3723.5 (3386.05-4091.53) | -0.02 (-0.03-0) |
| Poland |  | 8781938 (8222196-9365756) | 21014.73 (19676.56-22402.2) | 11902939 (11193159-12593118) | 35.53887632 | 21656.4 (20283.65-23008.56) | 0.1 (0.09-0.1) |  | 2722532 (2446441-3019080) | 6563.82 (5905.53-7258.64) | 3389358 (3026779-3728121) | 24.49285057 | 6515.74 (5870.6-7224.96) | -0.04 (-0.05--0.03) |
| Portugal |  | 2440130 (2297770-2589358) | 20012.68 (18766.17-21355.68) | 3535795 (3352156-3710429) | 44.90190599 | 21412.06 (20234.3-22657.68) | 0.24 (0.2-0.28) |  | 642666 (579788-710661) | 5426.73 (4920.79-6023.49) | 821494 (738600-900953) | 27.82597894 | 5374.23 (4860.9-5923.03) | -0.04 (-0.07--0.02) |
| Puerto Rico |  | 658443 (619529-698101) | 18202.17 (17126.45-19297.69) | 982881 (930065-1036274) | 49.27338879 | 19298.94 (18142.49-20384.92) | 0.2 (0.19-0.2) |  | 136948 (123694-150118) | 3769.25 (3402.78-4124.98) | 177233 (159866-192793) | 29.41677385 | 3822.78 (3469.84-4180.65) | 0.04 (0.03-0.05) |
| Qatar |  | 60316 (54973-66267) | 18310.72 (17225.06-19477.74) | 565014 (516856-618979) | 836.7635719 | 20089.15 (19000.64-21317.46) | 0.24 (0.22-0.26) |  | 16736 (14837-19096) | 4576.28 (4148.97-5065.07) | 138821 (123185-157670) | 729.489064 | 4706.06 (4260.13-5164.46) | 0.03 (0.01-0.05) |
| Republic of Korea |  | 8705669 (8104550-9367644) | 21995.3 (20706.42-23375.42) | 18083800 (17104636-19025569) | 180.308529 | 23566.8 (22272.99-24986.72) | 0.29 (0.25-0.34) |  | 2201499 (1976462-2464093) | 5291.2 (4780.54-5858.82) | 3660989 (3288790-4005409) | 169.4164303 | 5068.42 (4577.82-5594.5) | -0.1 (-0.12--0.08) |
| Republic of Moldova |  | 818752 (765374-874268) | 18256.96 (17089.29-19492.68) | 991550 (932320-1051515) | 6.672869882 | 19427.35 (18227.69-20677.57) | 0.22 (0.2-0.24) |  | 247646 (221883-275986) | 5490.86 (4930.57-6083.19) | 267436 (239683-295109) | -2.379260714 | 5498.88 (4948.56-6110.35) | 0 (-0.01-0.01) |
| Romania |  | 5398860 (5020079-5764528) | 20474.75 (18952.12-22007.49) | 5759119 (5388405-6099813) | 18.80084204 | 20770.55 (19393.75-22182.43) | 0.04 (0.03-0.04) |  | 1647443 (1473492-1840494) | 6352.02 (5718.51-7047.64) | 1608246 (1427431-1771549) | 11.7175031 | 6210.39 (5580.95-6921.08) | -0.1 (-0.11--0.09) |
| Russian Federation |  | 34546384 (32322354-36799598) | 19998.51 (18719.4-21271.93) | 41041395 (38670910-43565740) | 113.7676263 | 20226.76 (18998.89-21484.29) | 0.13 (0.09-0.17) |  | 10068880 (9039824-11144513) | 5928.95 (5344.46-6542.67) | 11248702 (10063892-12319770) | 117.8802845 | 5830.97 (5259.87-6416.93) | 0.02 (-0.01-0.04) |
| Rwanda |  | 668818 (621635-718913) | 16646.31 (15589.89-17657.73) | 1429717 (1293579-1554464) | 114.3327794 | 15963.34 (14567.91-17131.99) | 0.05 (-0.04-0.14) |  | 191748 (171931-214477) | 4396.66 (3940.94-4864.26) | 417782 (373945-465182) | 94.96581045 | 4335.81 (3913.67-4773.26) | -0.07 (-0.08--0.05) |
| Saint Kitts and Nevis |  | 6323 (5957-6700) | 17689.82 (16646.73-18707.79) | 13553 (12780-14366) | 138.7701623 | 18704.97 (17627.17-19866.94) | 0.17 (0.17-0.18) |  | 1366 (1234-1500) | 3757.62 (3396.01-4127.99) | 2663 (2399-2923) | 101.8182509 | 3758.23 (3407.14-4112.46) | 0 (-0.01-0) |
| Saint Lucia |  | 17620 (16468-18800) | 17465.88 (16412.09-18550.37) | 42072 (39732-44368) | 77.32606689 | 18517.66 (17423.76-19550.3) | 0.18 (0.17-0.19) |  | 4124 (3718-4551) | 3832.27 (3458.93-4212.85) | 8324 (7508-9101) | 53.24806403 | 3796.99 (3432.23-4152.5) | -0.04 (-0.04--0.03) |
| Saint Vincent and the Grenadines |  | 13783 (12906-14694) | 17062.65 (16043.54-18120.49) | 24441 (22920-25873) | 60.14958124 | 18090.95 (17003.24-19168.26) | 0.2 (0.2-0.2) |  | 3185 (2862-3510) | 3691.7 (3328.85-4056.74) | 4881 (4385-5340) | 48.40553642 | 3713.51 (3351.05-4068.88) | 0.03 (0.02-0.03) |
| Samoa |  | 19021 (17767-20254) | 17810.21 (16774.26-18928.76) | 30462 (28673-32360) | 72.82557231 | 18317.27 (17327.05-19431.2) | 0.07 (0.05-0.08) |  | 4642 (4199-5127) | 4060.59 (3669.75-4481.36) | 6889 (6249-7572) | 60.20819262 | 3998.58 (3628-4379.06) | -0.08 (-0.1--0.06) |
| San Marino |  | 6125 (5782-6488) | 20658.63 (19433.46-22008.17) | 10586 (9983-11167) | 119.3132713 | 20900.03 (19634.56-22168.25) | 0.04 (0.03-0.05) |  | 1486 (1339-1633) | 5196.78 (4709.47-5759.82) | 2381 (2148-2607) | 109.1255938 | 5093.74 (4602.59-5607.84) | -0.05 (-0.06--0.05) |
| Sao Tome and Principe |  | 12288 (11518-13100) | 16422.46 (15432.11-17425.85) | 26948 (25083-28666) | 299.2600401 | 17363.56 (16308.64-18385.34) | 0.19 (0.18-0.2) |  | 3100 (2804-3401) | 3890.7 (3524.27-4258.04) | 6484 (5867-7177) | 246.8079772 | 3883.84 (3529.58-4268.76) | -0.01 (-0.03-0) |
| Saudi Arabia |  | 1775402 (1631730-1925490) | 17611.16 (16475.8-18744.94) | 7088472 (6553450-7722318) | 150.2496664 | 19578.92 (18368.74-20846.15) | 0.27 (0.23-0.3) |  | 519889 (468700-575938) | 4623.7 (4167.67-5092.06) | 1803016 (1611765-2038865) | 135.4583937 | 4793.72 (4327.97-5276.3) | 0.11 (0.1-0.12) |
| Senegal |  | 710596 (662580-759882) | 16419.85 (15493.94-17442.15) | 1778265 (1655804-1901579) | 21.23561718 | 16995.15 (15946.16-18054.77) | 0.07 (0.06-0.09) |  | 187053 (168879-205778) | 3981.99 (3614.6-4361.6) | 440432 (396587-489103) | 11.17445252 | 3918.05 (3535.14-4307.91) | -0.1 (-0.12--0.08) |
| Serbia |  | 2194567 (2041351-2342582) | 19955.89 (18612.34-21378.58) | 2660597 (2494598-2825203) | 113.5838268 | 20987.92 (19580.33-22360.35) | 0.18 (0.17-0.18) |  | 666060 (591448-740315) | 6151.94 (5522.17-6829.14) | 740488 (662032-816029) | 91.82734421 | 6199.99 (5579.77-6868.74) | 0.02 (0.02-0.03) |
| Seychelles |  | 10097 (9476-10762) | 16681.71 (15721.45-17741.66) | 21566 (20304-22955) | 112.8550634 | 17686.33 (16700.65-18803.93) | 0.17 (0.16-0.19) |  | 2143 (1936-2350) | 3466.39 (3142.89-3804.61) | 4111 (3741-4559) | 109.3274865 | 3411.96 (3116.43-3748.19) | -0.05 (-0.06--0.04) |
| Sierra Leone |  | 439309 (407996-470905) | 16631.53 (15568.31-17690.8) | 935091 (867538-1001679) | 182.123783 | 16841.43 (15808.6-17892.33) | 0.04 (0.03-0.06) |  | 117587 (106742-130336) | 4174.39 (3742.1-4615.19) | 246142 (222334-273409) | 137.8233269 | 4059.15 (3669.41-4475.34) | -0.1 (-0.12--0.08) |
| Singapore |  | 632884 (591475-676555) | 21786.41 (20523.45-23068.12) | 1785516 (1690219-1892911) | 36.41513585 | 22665.71 (21389.27-24028.36) | 0.18 (0.17-0.2) |  | 144122 (130266-159604) | 4749.71 (4330.23-5209.22) | 342755 (310066-376276) | 25.74593207 | 4532.4 (4105.22-4966.14) | -0.07 (-0.1--0.03) |
| Slovakia |  | 1177769 (1105123-1251168) | 20630.05 (19335.48-21967.57) | 1606655 (1506655-1710269) | 42.16545018 | 20990.22 (19677.19-22386.68) | 0.06 (0.05-0.07) |  | 354969 (321084-395632) | 6261.98 (5672.58-6978.13) | 446359 (397406-493125) | 29.05381374 | 6162.57 (5556.76-6839.54) | -0.05 (-0.06--0.05) |
| Slovenia |  | 450234 (420490-480474) | 19468.69 (18154.72-20721.1) | 640078 (601571-678941) | 167.2224223 | 20117.46 (18762.11-21554.38) | 0.09 (0.07-0.1) |  | 134089 (120829-148922) | 5917.75 (5366.01-6533.82) | 173047 (153837-190626) | 156.3375254 | 5911.06 (5320.91-6545.19) | -0.03 (-0.04--0.01) |
| Solomon Islands |  | 30747 (28572-33030) | 15936.96 (14968.94-16933.81) | 82162 (76589-87972) | 163.9595865 | 17191.14 (16211.95-18229.57) | 0.26 (0.25-0.26) |  | 7957 (7147-8803) | 3775.5 (3411.01-4152.16) | 20396 (18482-22681) | 167.0543358 | 3988.73 (3635.43-4406.32) | 0.21 (0.2-0.23) |
| Somalia |  | 637496 (586873-689884) | 15680.16 (14624.39-16665.58) | 1682731 (1547344-1833094) | 114.6116203 | 15798.73 (14790.77-16869.36) | 0.03 (0.02-0.03) |  | 189147 (169413-210977) | 4167.6 (3745.34-4590.67) | 505125 (451232-564972) | 92.98293886 | 4185.3 (3772.5-4629.08) | 0 (-0.01-0.02) |
| South Africa |  | 4556096 (4251265-4863172) | 17699.72 (16665.28-18724.71) | 9777911 (9181072-10380002) | 107.7244203 | 18345.3 (17324.11-19365.55) | 0.15 (0.14-0.16) |  | 1163332 (1057177-1279196) | 4264.98 (3855.6-4654.72) | 2245032 (2038746-2478104) | 66.29529007 | 4115.94 (3741.54-4507.8) | -0.09 (-0.1--0.08) |
| South Sudan |  | 537096 (499483-578378) | 15718.9 (14710.53-16676.53) | 917007 (850166-986675) | 70.73445649 | 15970.41 (14964.48-16963.62) | 0.05 (0.05-0.05) |  | 152619 (137209-169451) | 4098.24 (3692.55-4531.93) | 257589 (232516-286325) | 68.77852699 | 4106.87 (3716-4506.53) | 0 (-0.01-0.01) |
| Spain |  | 9078055 (8683505-9511395) | 19279.35 (18409.93-20196.2) | 13271083 (12521649-14032358) | 46.18861335 | 18910.74 (17859.12-20087.81) | -0.04 (-0.14-0.06) |  | 2269249 (2084560-2441009) | 4988.56 (4613.3-5363.42) | 2974413 (2647546-3287435) | 31.07475251 | 4586.89 (4103.11-5079.55) | -0.15 (-0.26--0.03) |
| Sri Lanka |  | 2160156 (2013011-2314095) | 15737.67 (14798.37-16767.64) | 4376930 (4118845-4656375) | 102.6209954 | 16910.8 (15957.67-18010.32) | 0.24 (0.23-0.26) |  | 487950 (442471-536081) | 3427.8 (3109.17-3746.29) | 883297 (796623-969059) | 81.02219182 | 3469.27 (3143.64-3810.22) | 0.04 (0.03-0.05) |
| Sudan |  | 2316675 (2149447-2509738) | 17932.71 (16778.4-19143.76) | 5963272 (5523203-6415512) | 157.4064335 | 19617.7 (18391.35-20821.77) | 0.3 (0.29-0.32) |  | 677251 (608555-750017) | 4785.22 (4308.5-5307.05) | 1616381 (1456168-1782874) | 138.6678949 | 4869.69 (4398.04-5339.12) | 0.06 (0.06-0.06) |
| Suriname |  | 53598 (49839-57066) | 17498.49 (16371.8-18521.6) | 118081 (111209-125000) | 120.3091179 | 18600.7 (17523.05-19712.99) | 0.21 (0.21-0.22) |  | 12107 (10930-13312) | 3722.81 (3352.91-4083.16) | 23979 (21614-26364) | 98.06775415 | 3816.77 (3457.62-4195.71) | 0.09 (0.08-0.1) |
| Sweden |  | 1973039 (1855166-2093332) | 17006.07 (16001.51-18073.08) | 2811532 (2645336-2979802) | 42.49755081 | 18812.6 (17657.14-20066.89) | 0.35 (0.25-0.44) |  | 418117 (382729-454276) | 3736.5 (3432.24-4042.91) | 608845 (544413-668554) | 45.61600592 | 4317.04 (3866.88-4780.12) | 0.47 (0.34-0.61) |
| Switzerland |  | 1844040 (1756256-1936613) | 21415.63 (20352.55-22515.38) | 2744427 (2597173-2893214) | 48.82688144 | 21252.64 (20036.22-22642.86) | 0.08 (0.02-0.14) |  | 468753 (428266-507089) | 5673.59 (5193.13-6172.59) | 643403 (577254-705943) | 37.25839675 | 5315.36 (4783.03-5870.99) | -0.1 (-0.16--0.03) |
| Syrian Arab Republic |  | 1445281 (1339896-1555285) | 18888.2 (17693.82-20111.68) | 2837866 (2634753-3030653) | 96.35391453 | 19686.98 (18294.61-21008.78) | 0.14 (0.1-0.17) |  | 415851 (374061-460453) | 4874.18 (4396.97-5389) | 717050 (645114-786429) | 72.42964911 | 4967.69 (4475.57-5478.67) | 0.04 (0.03-0.06) |
| Taiwan (Province of China) |  | 3436772 (3265070-3612722) | 18468.34 (17615.24-19320.44) | 7491456 (7191178-7800897) | 117.9794299 | 20859.24 (20046.27-21739.04) | 0.43 (0.39-0.48) |  | 809061 (754095-867787) | 4246.97 (3963.22-4543.46) | 1582354 (1469572-1696355) | 95.57901503 | 4622.49 (4327.21-4917.92) | 0.32 (0.26-0.38) |
| Tajikistan |  | 568060 (528360-612488) | 16480.47 (15429.58-17653.77) | 1315356 (1222286-1414736) | 131.5521779 | 16936.9 (15882.67-18042.42) | 0.13 (0.1-0.15) |  | 175784 (157170-194606) | 4796.78 (4314.03-5302.19) | 389594 (350542-433931) | 121.6322258 | 4738.63 (4250.99-5257) | -0.04 (-0.05--0.04) |
| Thailand |  | 7890364 (7362834-8462904) | 16855.88 (15852.03-17879.81) | 17330347 (16343843-18322046) | 154.2695335 | 18109.67 (17131.39-19211.72) | 0.25 (0.22-0.27) |  | 1519879 (1372989-1674868) | 3180.63 (2883.43-3492.95) | 3094883 (2779691-3414087) | 143.2791616 | 3341.86 (3025.65-3671.99) | 0.21 (0.17-0.25) |
| Timor-Leste |  | 69513 (64026-75396) | 14850.69 (13899.48-15802.6) | 158538 (146569-170273) | 119.6393794 | 15706.01 (14659.92-16776.33) | 0.2 (0.18-0.22) |  | 16940 (15265-18856) | 3368.93 (3047.12-3695.2) | 35173 (31913-38701) | 103.6269831 | 3325.12 (3007.68-3666.35) | -0.05 (-0.07--0.04) |
| Togo |  | 326750 (302493-351034) | 16874.31 (15846.73-17924.39) | 974727 (909522-1040638) | 128.0691983 | 17343.48 (16327.14-18379.39) | 0.07 (0.06-0.08) |  | 90360 (81256-100576) | 4214.2 (3802.82-4650.36) | 249218 (224219-277733) | 107.6371221 | 4110.75 (3735.84-4527.59) | -0.11 (-0.14--0.08) |
| Tokelau |  | 228 (214-242) | 17151.25 (16129.5-18205.67) | 262 (248-277) | 198.3100447 | 18377.18 (17316.31-19421.57) | 0.23 (0.22-0.24) |  | 52 (47-58) | 3906.64 (3523.65-4308.41) | 56 (51-61) | 175.8052663 | 3957.77 (3594.76-4347.51) | 0.05 (0.04-0.07) |
| Tonga |  | 11671 (10910-12454) | 17689.34 (16643.41-18789.02) | 16051 (15126-17008) | 15.10312746 | 18506.49 (17476.52-19566.12) | 0.11 (0.09-0.13) |  | 2797 (2534-3076) | 4012.53 (3635.89-4414.18) | 3571 (3244-3911) | 6.965834438 | 4014.31 (3648.32-4388.01) | -0.02 (-0.04-0) |
| Trinidad and Tobago |  | 176582 (165279-187904) | 17968.1 (16871.81-19043.84) | 335233 (316670-354164) | 37.5221592 | 18946.75 (17836.2-20057.72) | 0.19 (0.18-0.19) |  | 39015 (35305-43166) | 3775.46 (3399.12-4144.59) | 64658 (58341-70824) | 27.65773851 | 3810.67 (3461.23-4181.99) | 0.04 (0.03-0.04) |
| Tunisia |  | 1179170 (1098710-1258942) | 18717.78 (17540.98-19826.88) | 2756377 (2600000-2924542) | 89.84613599 | 20633.76 (19458.49-21903.75) | 0.32 (0.31-0.32) |  | 321270 (291327-352157) | 4790.29 (4347.12-5248.91) | 647523 (585407-717363) | 65.72595806 | 4937.04 (4460.41-5448.28) | 0.09 (0.08-0.1) |
| Turkmenistan |  | 421649 (392320-454482) | 17209.37 (16168.72-18416.79) | 849535 (789363-906997) | 133.7556061 | 18210.45 (16993.55-19376.39) | 0.21 (0.19-0.23) |  | 128970 (115767-142935) | 4919.56 (4428.11-5446.49) | 235477 (211888-261415) | 101.5508727 | 4903.51 (4428.89-5412.7) | 0.01 (0-0.01) |
| Tuvalu |  | 1304 (1222-1391) | 17114.75 (16125.66-18165.51) | 2039 (1922-2160) | 128.6802076 | 18069.16 (17070.48-19128.7) | 0.18 (0.17-0.19) |  | 309 (279-341) | 3950.19 (3576.41-4344.51) | 454 (412-501) | 97.03862863 | 3962.5 (3600.79-4367.65) | 0.01 (0-0.02) |
| Türkiye |  | 8727606 (8204419-9265372) | 19535.71 (18438.26-20595.26) | 19958307 (18823851-21142989) | 101.4789618 | 21160.26 (19950.74-22408.01) | 0.29 (0.25-0.33) |  | 2380284 (2179090-2584213) | 5029.05 (4587.28-5455.91) | 4690079 (4214049-5162901) | 82.58337114 | 5055.69 (4536.71-5560) | 0.05 (0.01-0.1) |
| Uganda |  | 1471016 (1360305-1582416) | 16051.02 (15000.97-17008.99) | 3909525 (3626917-4213187) | 56.36065717 | 16746.3 (15686.07-17786.72) | 0.14 (0.13-0.14) |  | 429305 (385354-473958) | 4280.77 (3864.62-4707.87) | 1088268 (974613-1203197) | 46.81851981 | 4227.37 (3802.08-4679.83) | -0.04 (-0.05--0.03) |
| Ukraine |  | 13265577 (12415678-14076520) | 20566.99 (19166.14-21890.73) | 13299049 (12502324-14117725) | 165.7704571 | 20918.32 (19595.01-22240.28) | 0.08 (0.07-0.1) |  | 3955475 (3539048-4348859) | 6330.18 (5683.7-6977.45) | 3752367 (3340955-4106872) | 153.4951647 | 6260.6 (5616.78-6895.16) | -0.02 (-0.04--0.01) |
| United Arab Emirates |  | 228321 (208858-250503) | 17535.32 (16491.55-18590.86) | 2099024 (1925415-2306237) | 35.200886 | 19188.66 (18140.33-20337.07) | 0.28 (0.27-0.29) |  | 63096 (55709-71491) | 4320.88 (3913.98-4720.1) | 493984 (435285-565477) | 32.49798684 | 4472.26 (4056.28-4885.39) | 0.09 (0.06-0.11) |
| United Kingdom |  | 15356127 (14551705-16206295) | 21258.96 (20092.11-22567.09) | 20761620 (19682504-21831412) | 0.252324196 | 21889.66 (20687.7-23209.12) | 0.1 (0.08-0.13) |  | 3637960 (3287434-3987078) | 5330.67 (4816.35-5861.69) | 4820224 (4338404-5273119) | -5.1348601 | 5408.66 (4892.6-5953.58) | 0.15 (0.1-0.19) |
| United Republic of Tanzania |  | 2443459 (2272804-2617848) | 16616.75 (15589.3-17618.29) | 6212973 (5800646-6679956) | 819.3280503 | 17021.22 (16005.78-18028.04) | 0.06 (0.05-0.07) |  | 678441 (609093-748806) | 4254.28 (3843.22-4665.34) | 1650506 (1483336-1836269) | 682.9113014 | 4193.09 (3782.47-4621.98) | -0.04 (-0.05--0.04) |
| United States of America |  | 72188945 (68427391-75788751) | 25253.59 (23951.58-26526.93) | 121607112 (117589364-125668462) | 46.05649754 | 27919.91 (26947.1-28824.75) | 0.33 (0.31-0.35) |  | 16996437 (15386589-18747788) | 6055.38 (5510.09-6643.32) | 24769619 (22908114-26687441) | 22.17759592 | 5886.47 (5472.58-6325.24) | 0 (-0.06-0.06) |
| United States Virgin Islands |  | 17871 (16751-19005) | 18173.8 (17106.12-19276.07) | 26101 (24679-27520) | 35.80452329 | 19273.76 (18190.62-20355.56) | 0.2 (0.19-0.21) |  | 3844 (3478-4249) | 3779.02 (3433.62-4143.96) | 4697 (4204-5127) | 29.78649257 | 3819.95 (3457.44-4182.71) | 0.04 (0.02-0.05) |
| Uruguay |  | 789459 (746761-835238) | 22901.69 (21592.09-24327.84) | 1072120 (1021235-1130713) | 68.45669529 | 24920.08 (23605.15-26433.25) | 0.32 (0.29-0.34) |  | 170220 (154394-186869) | 5034 (4562.81-5531.9) | 220923 (199157-242096) | 45.73418476 | 5333.7 (4801.28-5894.13) | 0.17 (0.14-0.21) |
| Uzbekistan |  | 2463623 (2295342-2651113) | 17400.67 (16291.33-18545.6) | 5733696 (5340226-6123666) | 132.7342804 | 18402.86 (17264.52-19530.64) | 0.2 (0.19-0.22) |  | 746076 (672883-830994) | 4965.16 (4468.2-5500.86) | 1606619 (1446041-1788642) | 115.3426934 | 4999.98 (4525.13-5532.89) | 0.04 (0.03-0.05) |
| Vanuatu |  | 15085 (14012-16196) | 16681.21 (15655.23-17758.13) | 40300 (37839-43071) | 167.1616321 | 17602.94 (16631.24-18650.11) | 0.17 (0.16-0.18) |  | 3896 (3499-4332) | 3968.26 (3576.29-4366.16) | 9813 (8852-10935) | 151.8909036 | 4061.48 (3668.13-4484.67) | 0.07 (0.05-0.09) |
| Venezuela (Bolivarian Republic of) |  | 2742155 (2546416-2946867) | 20349.36 (19154.85-21673.22) | 6279386 (5936619-6653183) | 128.9945678 | 21156.13 (20008.67-22371.65) | 0.09 (0.08-0.11) |  | 614162 (553562-681031) | 4185.75 (3782.75-4628.25) | 1211958 (1088413-1326515) | 97.33527773 | 4153.12 (3748.85-4547.29) | -0.05 (-0.06--0.04) |
| Viet Nam |  | 7320737 (6861753-7808223) | 15247.86 (14355.31-16165.41) | 17691832 (16553550-18928196) | 141.6673619 | 16408.01 (15369.21-17507.53) | 0.27 (0.25-0.28) |  | 1736963 (1576295-1909502) | 3502.51 (3172.09-3848.93) | 3755259 (3377616-4153740) | 116.1968365 | 3508.15 (3181.87-3862.37) | 0.05 (0.03-0.07) |
| Yemen |  | 1355352 (1248899-1469451) | 17878.45 (16680.19-19116.64) | 4281023 (3962587-4620269) | 215.8605725 | 18923.64 (17771.68-20140.18) | 0.22 (0.2-0.23) |  | 412340 (369235-455796) | 4855.43 (4350.13-5350.92) | 1199653 (1076640-1333329) | 190.9378516 | 4826.16 (4338.59-5305.04) | -0.03 (-0.04--0.02) |
| Zambia |  | 647111 (604683-691746) | 15590.9 (14704.95-16516.18) | 1876138 (1748403-2022176) | 189.9250135 | 16673.77 (15706.08-17678.89) | 0.18 (0.16-0.2) |  | 173536 (158282-190235) | 3792.89 (3440.73-4137.56) | 494614 (447724-548752) | 185.0212606 | 4006.61 (3629.38-4387.15) | 0.09 (0.05-0.13) |
| Zimbabwe |  | 945682 (886294-1007155) | 16522.11 (15619.89-17384.03) | 1732409 (1616179-1860781) | 83.19157901 | 17277.33 (16264.25-18303.11) | 0.13 (0.12-0.14) |  | 250377 (227521-275773) | 4031.77 (3655.56-4423.84) | 448448 (402457-497902) | 79.10880652 | 4175.39 (3750.22-4621.36) | 0.12 (0.12-0.13) |
| Num_1990: numbers in 1990; ASR_1990: age-standardized rates in 1990; Num_2021: numbers in 2021; ASR_2021: age-standardized rates in 1990; EAPC_CI: estimated annual percentage change (95% CI); Num Change (%): number change from 1990 to 2021. | | | | | | | | | | | | | | |

| **Supplementary table 3. Decomposition analysis of the number of prevalent diseases, incidences, deaths and DALYs in musculoskeletal disorders from 1990 to 2021.** | | | | | | | | | | | | | | | | |
| --- | --- | --- | --- | --- | --- | --- | --- | --- | --- | --- | --- | --- | --- | --- | --- | --- |
| location | Prevalence | | | | Incidence | | | | Death | | | | DALY | | | |
| Overll difference | varname | value | Percentage | Overll difference | varname | value | Percentage | Overll difference | varname | value | Percentage | Overll difference | varname | value | Percentage |
| Low SDI | 68417441.72 | Aging | 957822.593 | 0.01399968 | 16518146.16 | Aging | 269075.968 | 0.01629 | 3696.03 | Aging | 186.545 | 0.050472 | 6772478.6 | Aging | 108910.998 | 0.01608141 |
| Low SDI | 68417441.72 | Population | 65552905.38 | 0.95813149 | 16518146.16 | Population | 17014368.81 | 1.030041 | 3696.03 | Population | 3301.246 | 0.893187 | 6772478.6 | Population | 6530174.977 | 0.96422231 |
| Low SDI | 68417441.72 | Epidemiological change | 1906713.745 | 0.02786883 | 16518146.16 | Epidemiological change | -765298.619 | -0.04633 | 3696.03 | Epidemiological change | 208.238 | 0.056341 | 6772478.6 | Epidemiological change | 133392.622 | 0.01969628 |
| Low-middle SDI | 156118662.6 | Aging | 40560987.07 | 0.2598087 | 30198010.68 | Aging | 7722224.196 | 0.25572 | 15545.13 | Aging | 5751.387 | 0.36998 | 15158213.24 | Aging | 3826238.472 | 0.25242015 |
| Low-middle SDI | 156118662.6 | Population | 104325915.9 | 0.66824756 | 30198010.68 | Population | 23857452.1 | 0.790034 | 15545.13 | Population | 7565.4 | 0.486673 | 15158213.24 | Population | 10364104.11 | 0.68372861 |
| Low-middle SDI | 156118662.6 | Epidemiological change | 11231759.66 | 0.07194374 | 30198010.68 | Epidemiological change | -1381665.62 | -0.04575 | 15545.13 | Epidemiological change | 2228.342 | 0.143347 | 15158213.24 | Epidemiological change | 967870.655 | 0.06385124 |
| Middle SDI | 254854282.3 | Aging | 106096802.9 | 0.41630379 | 45136056.41 | Aging | 19529610.44 | 0.432683 | 15327.04 | Aging | 8101.278 | 0.528561 | 23039424.08 | Aging | 9390029.993 | 0.40756357 |
| Middle SDI | 254854282.3 | Population | 128794770.9 | 0.50536632 | 45136056.41 | Population | 28684520.88 | 0.635512 | 15327.04 | Population | 7534.693 | 0.491595 | 23039424.08 | Population | 12427977.42 | 0.53942223 |
| Middle SDI | 254854282.3 | Epidemiological change | 19962708.44 | 0.07832989 | 45136056.41 | Epidemiological change | -3078074.916 | -0.0682 | 15327.04 | Epidemiological change | -308.934 | -0.02016 | 23039424.08 | Epidemiological change | 1221416.667 | 0.0530142 |
| High-middle SDI | 142892603.3 | Aging | 67249905.82 | 0.47063252 | 24470564.45 | Aging | 13741431.23 | 0.561549 | 8835.64 | Aging | 6735.754 | 0.762339 | 12429190.55 | Aging | 5974089.857 | 0.48064995 |
| High-middle SDI | 142892603.3 | Population | 68702882.81 | 0.48080083 | 24470564.45 | Population | 16736957.75 | 0.683963 | 8835.64 | Population | 4075.777 | 0.461288 | 12429190.55 | Population | 6615986.502 | 0.53229424 |
| High-middle SDI | 142892603.3 | Epidemiological change | 6939814.67 | 0.04856665 | 24470564.45 | Epidemiological change | -6007824.523 | -0.24551 | 8835.64 | Epidemiological change | -1975.89 | -0.22363 | 12429190.55 | Epidemiological change | -160885.811 | -0.0129442 |
| High SDI | 115341964.7 | Aging | 42228865.86 | 0.36611884 | 18963792.25 | Aging | 7536415.55 | 0.397411 | 8836.41 | Aging | 9413.905 | 1.065354 | 10516319.53 | Aging | 3719258.747 | 0.35366544 |
| High SDI | 115341964.7 | Population | 59606313.23 | 0.51677907 | 18963792.25 | Population | 13636700.16 | 0.719091 | 8836.41 | Population | 5312.75 | 0.601234 | 10516319.53 | Population | 5890035.101 | 0.56008522 |
| High SDI | 115341964.7 | Epidemiological change | 13506785.66 | 0.1171021 | 18963792.25 | Epidemiological change | -2209323.461 | -0.1165 | 8836.41 | Epidemiological change | -5890.24 | -0.66659 | 10516319.53 | Epidemiological change | 907025.679 | 0.08624935 |
| Global | 738903045.1 | Aging | 229000782.5 | 0.30991993 | 135055774.7 | Aging | 44312628.45 | 0.328106 | 51781.11 | Aging | 27168 | 0.52467 | 68028817.87 | Aging | 20709742.19 | 0.30442602 |
| Global | 738903045.1 | Population | 469167679.3 | 0.63495161 | 135055774.7 | Population | 109142689.4 | 0.80813 | 51781.11 | Population | 31803.52 | 0.614191 | 68028817.87 | Population | 45886197.14 | 0.67451116 |
| Global | 738903045.1 | Epidemiological change | 40734583.3 | 0.05512846 | 135055774.7 | Epidemiological change | -18399543.18 | -0.13624 | 51781.11 | Epidemiological change | -7190.41 | -0.13886 | 68028817.87 | Epidemiological change | 1432878.536 | 0.02106282 |

| **Supplementary table 4. Frontier Analysis of ASPR and ASIR in musculoskeletal disorders.** | | | | | | | | | | |
| --- | --- | --- | --- | --- | --- | --- | --- | --- | --- | --- |
| location | Prevalence | | | |  | location | Incidence | | | |
| SDI | frontier | eff_diff | rank_eff_ASR | SDI | frontier | eff_diff | rank_eff_ASR |
| Albania | 0.686 | 13697.93 | 6636.82 | 57 (57) |  | Afghanistan | 0.348 | 3168.09 | 1672.59 | 67 (67) |
| Algeria | 0.657 | 13697.93 | 6644.77 | 58 (58) |  | Albania | 0.686 | 3168.09 | 3021.1 | 93 (93) |
| Andorra | 0.899 | 13697.93 | 6657.84 | 59 (59) |  | Algeria | 0.657 | 3168.09 | 1696.17 | 68 (68) |
| Angola | 0.475 | 13697.93 | 4166.32 | 25 (25) |  | Antigua and Barbuda | 0.748 | 3168.09 | 588.73 | 14 (11) |
| Antigua and Barbuda | 0.748 | 13697.93 | 4936.6 | 42 (42) |  | Australia | 0.844 | 3168.09 | 2611.16 | 86 (86) |
| Bahrain | 0.756 | 13697.93 | 6577.96 | 56 (56) |  | Azerbaijan | 0.688 | 3168.09 | 1846.39 | 72 (72) |
| Barbados | 0.747 | 13697.93 | 5358.08 | 45 (45) |  | Bahrain | 0.756 | 3168.09 | 1537.14 | 62 (62) |
| Bhutan | 0.46 | 13697.93 | 7180.6 | 65 (65) |  | Bangladesh | 0.488 | 3168.09 | 1377.34 | 59 (59) |
| Bosnia and Herzegovina | 0.723 | 13697.93 | 6675.9 | 60 (60) |  | Barbados | 0.747 | 3168.09 | 636.11 | 19 (16) |
| Brazil | 0.645 | 13697.93 | 8962.58 | 77 (77) |  | Belarus | 0.75 | 3168.09 | 2430.1 | 84 (84) |
| Brunei Darussalam | 0.828 | 13697.93 | 9342.75 | 78 (78) |  | Belgium | 0.856 | 3168.09 | 2014.28 | 78 (78) |
| Bulgaria | 0.769 | 13697.93 | 6919.35 | 61 (61) |  | Bermuda | 0.818 | 3168.09 | 685.09 | 25 (22) |
| Cabo Verde | 0.53 | 13697.93 | 3755.81 | 19 (19) |  | Bolivia (Plurinational State of) | 0.571 | 3168.09 | 643.26 | 20 (17) |
| Cambodia | 0.474 | 13697.93 | 2638.71 | 4 (3) |  | Brazil | 0.645 | 3168.09 | 1982.87 | 77 (77) |
| Cameroon | 0.495 | 13697.93 | 4265.33 | 26 (26) |  | Bulgaria | 0.769 | 3168.09 | 2932.18 | 92 (92) |
| Comoros | 0.46 | 13697.93 | 3091.07 | 6 (6) |  | Burkina Faso | 0.262 | 3803.5 | 311.99 | 5 (41) |
| Congo | 0.573 | 13697.93 | 4154.42 | 24 (24) |  | Cabo Verde | 0.53 | 3168.09 | 816.27 | 31 (29) |
| Costa Rica | 0.685 | 13697.93 | 8372.99 | 75 (75) |  | Cameroon | 0.495 | 3168.09 | 1077.25 | 50 (48) |
| Cuba | 0.673 | 13697.93 | 4680.06 | 39 (39) |  | Canada | 0.878 | 3168.09 | 1704.83 | 69 (69) |
| Democratic People's Republic of Korea | 0.563 | 13697.93 | 4325.63 | 27 (27) |  | Central African Republic | 0.279 | 3368.93 | 955.07 | 43 (55) |
| Dominican Republic | 0.597 | 13697.93 | 4624.86 | 35 (35) |  | Chad | 0.243 | 3803.5 | 492.95 | 9 (52) |
| Equatorial Guinea | 0.69 | 13697.93 | 4860.66 | 41 (41) |  | Chile | 0.764 | 3168.09 | 2162.25 | 79 (79) |
| France | 0.839 | 13697.93 | 6497.82 | 53 (53) |  | Comoros | 0.46 | 3168.09 | 901.63 | 39 (37) |
| Gambia | 0.404 | 13697.93 | 3629.43 | 17 (17) |  | Congo | 0.573 | 3168.09 | 1102.12 | 52 (50) |
| Georgia | 0.707 | 13697.93 | 3482.87 | 15 (15) |  | Cook Islands | 0.769 | 3168.09 | 909.7 | 41 (39) |
| Ghana | 0.562 | 13697.93 | 4009.52 | 23 (23) |  | Croatia | 0.799 | 3168.09 | 2843.4 | 90 (90) |
| Greece | 0.799 | 13697.93 | 7102.84 | 63 (63) |  | Cuba | 0.673 | 3168.09 | 502.02 | 10 (7) |
| Greenland | 0.766 | 13697.93 | 10565.21 | 79 (79) |  | Cyprus | 0.846 | 3168.09 | 1980.46 | 76 (76) |
| Grenada | 0.674 | 13697.93 | 4619.11 | 34 (34) |  | Czechia | 0.833 | 3168.09 | 3173.23 | 96 (96) |
| Guam | 0.818 | 13697.93 | 5234.99 | 44 (44) |  | C么te d'Ivoire | 0.413 | 3168.09 | 1019.72 | 47 (45) |
| Guinea | 0.33 | 13697.93 | 3401.94 | 14 (14) |  | Democratic People's Republic of Korea | 0.563 | 3168.09 | 882.46 | 35 (33) |
| Guinea-Bissau | 0.36 | 13697.93 | 3198.04 | 8 (8) |  | Dominica | 0.734 | 3168.09 | 602.05 | 17 (14) |
| India | 0.571 | 13697.93 | 6250.35 | 50 (50) |  | Ecuador | 0.645 | 3168.09 | 447.86 | 8 (6) |
| Israel | 0.808 | 13697.93 | 7498.42 | 71 (71) |  | Eritrea | 0.401 | 3168.09 | 747.32 | 27 (25) |
| Italy | 0.806 | 13697.93 | 7663.72 | 72 (72) |  | Estonia | 0.84 | 3168.09 | 2417.68 | 83 (83) |
| Japan | 0.875 | 13697.93 | 11316.55 | 80 (80) |  | Eswatini | 0.582 | 3168.09 | 594.14 | 16 (13) |
| Kiribati | 0.532 | 13697.93 | 4573.66 | 33 (33) |  | Ethiopia | 0.348 | 3168.09 | 1154.49 | 55 (54) |
| Kyrgyzstan | 0.601 | 13697.93 | 4662.75 | 37 (37) |  | Finland | 0.861 | 3168.09 | 1575.42 | 64 (64) |
| Latvia | 0.825 | 13697.93 | 6209.34 | 49 (49) |  | Georgia | 0.707 | 3168.09 | 1594.78 | 65 (65) |
| Liberia | 0.375 | 13697.93 | 3361.97 | 13 (13) |  | Germany | 0.903 | 3168.09 | 2433.53 | 85 (85) |
| Lithuania | 0.848 | 13697.93 | 6331.56 | 51 (51) |  | Ghana | 0.562 | 3168.09 | 784.17 | 28 (26) |
| Luxembourg | 0.9 | 13697.93 | 7164.98 | 64 (64) |  | Greece | 0.799 | 3168.09 | 1895.06 | 73 (73) |
| Malawi | 0.389 | 13697.93 | 3227.48 | 10 (10) |  | Grenada | 0.674 | 3168.09 | 584.99 | 13 (10) |
| Maldives | 0.567 | 13697.93 | 3095.27 | 7 (7) |  | Guinea | 0.33 | 3168.09 | 1007.11 | 46 (44) |
| Marshall Islands | 0.549 | 13697.93 | 3974.27 | 21 (21) |  | Guinea-Bissau | 0.36 | 3168.09 | 892.39 | 38 (36) |
| Mexico | 0.654 | 13697.93 | 8887.97 | 76 (76) |  | Hungary | 0.796 | 3168.09 | 3348.93 | 97 (97) |
| Micronesia (Federated States of) | 0.585 | 13697.93 | 4494.62 | 31 (31) |  | Indonesia | 0.665 | 3168.09 | 620.55 | 18 (15) |
| Monaco | 0.907 | 13697.93 | 7373.56 | 69 (69) |  | Iran (Islamic Republic of) | 0.675 | 3168.09 | 2234.35 | 81 (81) |
| Montenegro | 0.796 | 13697.93 | 7324.19 | 68 (68) |  | Jamaica | 0.689 | 3168.09 | 657.52 | 24 (21) |
| Namibia | 0.617 | 13697.93 | 3683.38 | 18 (18) |  | Japan | 0.875 | 3168.09 | 2615.3 | 87 (87) |
| Netherlands | 0.888 | 13697.93 | 6532.89 | 55 (55) |  | Jordan | 0.736 | 3168.09 | 1732.97 | 70 (70) |
| New Zealand | 0.845 | 13697.93 | 8172.24 | 74 (74) |  | Latvia | 0.825 | 3168.09 | 2352.87 | 82 (82) |
| Niger | 0.167 | 15512.19 | 1012.69 | 2 (5) |  | Lesotho | 0.512 | 3168.09 | 743.17 | 26 (24) |
| Nigeria | 0.52 | 13697.93 | 4431.98 | 30 (30) |  | Liberia | 0.375 | 3168.09 | 908.98 | 40 (38) |
| North Macedonia | 0.749 | 13697.93 | 6202.43 | 48 (48) |  | Madagascar | 0.401 | 3168.09 | 971.32 | 44 (42) |
| Oman | 0.788 | 13697.93 | 6066.67 | 47 (47) |  | Malawi | 0.389 | 3168.09 | 1031.46 | 49 (47) |
| Papua New Guinea | 0.399 | 13697.93 | 2760.06 | 5 (4) |  | Malaysia | 0.742 | 3168.09 | 286.11 | 4 (3) |
| Poland | 0.807 | 13697.93 | 7958.46 | 73 (73) |  | Mali | 0.268 | 3803.5 | 100.87 | 1 (23) |
| Qatar | 0.835 | 13697.93 | 6391.22 | 52 (52) |  | Mauritius | 0.71 | 3168.09 | 393.24 | 7 (5) |
| Romania | 0.765 | 13697.93 | 7072.61 | 62 (62) |  | Mexico | 0.654 | 3168.09 | 1232.58 | 57 (57) |
| Russian Federation | 0.81 | 13697.93 | 6528.82 | 54 (54) |  | Micronesia (Federated States of) | 0.585 | 3168.09 | 855.71 | 34 (32) |
| Rwanda | 0.434 | 13697.93 | 2265.41 | 3 (2) |  | Monaco | 0.907 | 3168.09 | 1913.44 | 74 (74) |
| Saint Vincent and the Grenadines | 0.632 | 13697.93 | 4393.02 | 28 (28) |  | Nauru | 0.623 | 3168.09 | 889.34 | 36 (34) |
| San Marino | 0.889 | 13697.93 | 7202.1 | 66 (66) |  | New Zealand | 0.845 | 3168.09 | 2873.92 | 91 (91) |
| Senegal | 0.394 | 13697.93 | 3297.22 | 11 (11) |  | Nigeria | 0.52 | 3168.09 | 1172.77 | 56 (56) |
| Seychelles | 0.729 | 13697.93 | 3988.39 | 22 (22) |  | Niue | 0.716 | 3168.09 | 818.05 | 32 (30) |
| Slovakia | 0.817 | 13697.93 | 7292.29 | 67 (67) |  | North Macedonia | 0.749 | 3168.09 | 2697.78 | 88 (88) |
| Solomon Islands | 0.412 | 13697.93 | 3493.2 | 16 (16) |  | Oman | 0.788 | 3168.09 | 1504.71 | 61 (61) |
| Somalia | 0.086 | 15680.16 | 118.58 | 1 (1) |  | Pakistan | 0.454 | 3168.09 | 1093.53 | 51 (49) |
| South Africa | 0.683 | 13697.93 | 4647.37 | 36 (36) |  | Panama | 0.691 | 3168.09 | 1117.39 | 53 (51) |
| Spain | 0.772 | 13697.93 | 5212.8 | 43 (43) |  | Paraguay | 0.643 | 3168.09 | 1261.55 | 58 (58) |
| Sri Lanka | 0.695 | 13697.93 | 3212.87 | 9 (9) |  | Philippines | 0.628 | 3168.09 | 555.41 | 12 (9) |
| Sudan | 0.52 | 13697.93 | 5919.76 | 46 (46) |  | Portugal | 0.748 | 3168.09 | 2206.14 | 80 (80) |
| Thailand | 0.692 | 13697.93 | 4411.74 | 29 (29) |  | Puerto Rico | 0.819 | 3168.09 | 654.7 | 23 (20) |
| Tokelau | 0.631 | 13697.93 | 4679.24 | 38 (38) |  | Qatar | 0.835 | 3168.09 | 1537.98 | 63 (63) |
| Turkmenistan | 0.675 | 13697.93 | 4512.52 | 32 (32) |  | Romania | 0.765 | 3168.09 | 3042.3 | 94 (94) |
| United Republic of Tanzania | 0.428 | 13697.93 | 3323.29 | 12 (12) |  | Saint Kitts and Nevis | 0.751 | 3168.09 | 590.14 | 15 (12) |
| United States of America | 0.864 | 13697.93 | 14221.98 | 81 (81) |  | Saint Vincent and the Grenadines | 0.632 | 3168.09 | 545.43 | 11 (8) |
| Uzbekistan | 0.636 | 13697.93 | 4704.92 | 40 (40) |  | San Marino | 0.889 | 3168.09 | 1925.65 | 75 (75) |
| Vanuatu | 0.49 | 13697.93 | 3905.01 | 20 (20) |  | Seychelles | 0.729 | 3168.09 | 243.87 | 3 (2) |
| Venezuela (Bolivarian Republic of) | 0.612 | 13697.93 | 7458.2 | 70 (70) |  | Sierra Leone | 0.352 | 3168.09 | 891.06 | 37 (35) |
|  |  |  |  |  |  | Solomon Islands | 0.412 | 3168.09 | 820.64 | 33 (31) |
|  |  |  |  |  |  | Suriname | 0.641 | 3168.09 | 648.69 | 21 (18) |
|  |  |  |  |  |  | Sweden | 0.877 | 3168.09 | 1148.95 | 54 (53) |
|  |  |  |  |  |  | Taiwan (Province of China) | 0.873 | 3168.09 | 1454.4 | 60 (60) |
|  |  |  |  |  |  | Timor-Leste | 0.519 | 3168.09 | 157.03 | 2 (1) |
|  |  |  |  |  |  | Togo | 0.422 | 3168.09 | 942.66 | 42 (40) |
|  |  |  |  |  |  | Tokelau | 0.631 | 3168.09 | 789.68 | 29 (27) |
|  |  |  |  |  |  | Turkmenistan | 0.675 | 3168.09 | 1735.42 | 71 (71) |
|  |  |  |  |  |  | Tuvalu | 0.594 | 3168.09 | 794.41 | 30 (28) |
|  |  |  |  |  |  | Ukraine | 0.741 | 3168.09 | 3092.51 | 95 (95) |
|  |  |  |  |  |  | United Republic of Tanzania | 0.428 | 3168.09 | 1025 | 48 (46) |
|  |  |  |  |  |  | United States of America | 0.864 | 3168.09 | 2718.38 | 89 (89) |
|  |  |  |  |  |  | United States Virgin Islands | 0.804 | 3168.09 | 651.87 | 22 (19) |
|  |  |  |  |  |  | Venezuela (Bolivarian Republic of) | 0.612 | 3168.09 | 985.03 | 45 (43) |
|  |  |  |  |  |  | Viet Nam | 0.622 | 3168.09 | 340.06 | 6 (4) |
|  |  |  |  |  |  | Yemen | 0.417 | 3168.09 | 1658.07 | 66 (66) |
| SDI: sociodemographic index; eff_diff: effective difference; rank_eff_ASR: Ranking of effective differences in age-standardised rates. | | | | | | | | | | |
